# **Demographic Characteristics, BAV Sievers Types, and Interactions Between BAV-Associated Valvulopathy and Aortopathy Differently Affect BAV Comorbidities and Outcomes of Aortic Valve Replacement**

Yijia Li<sup>1,2</sup> MD., Qiong Zhao<sup>3#</sup> MD., Ph.D., Yue Qi<sup>4</sup>, Yichen Qu<sup>1</sup> MD., Ph.D., Akshay Kumar<sup>5</sup> MD.,  
Ph.D., Yan Yang<sup>1#</sup> MD., Ph.D., Xiongwen Chen<sup>2#</sup>, Ph.D.

<sup>1</sup> Department of Echocardiography, <sup>4</sup> and Department of Epidemiology, Beijing Anzhen Hospital, Capital Medical University, and Beijing Institute of Heart Lung and Blood Vessel Diseases; <sup>2</sup> Department of Physiology & Cardiovascular Research Center, Temple University School of Medicine; <sup>3</sup> Inova Heart and Vascular Institute, Inova Fairfax Hospital; <sup>5</sup> Department of Cardiothoracic Surgery, Medanta Hospital, Gurugram, India

Short Title: Risk Factors of BAV comorbidities and AVR outcomes

Correspondence: #

Xiongwen Chen: Address: Department of Physiology & Cardiovascular Research Center, Temple University School of Medicine, 3500 N. Broad St, Philadelphia, PA 19140; Phone: 215-707-3542; Fax: 215-707-5737; Email: [xchen001@temple.edu](mailto:xchen001@temple.edu)

Ya Yang: Department of echocardiography, Beijing Anzhen Hospital, Capital Medical University, and Beijing Institute of Heart Lung and Blood Vessel Diseases, Anzhen Lu 2 Hao, Beijing 100029, China; Tel: +86-10-64456450; Fax: +86-10-66591706; E-mail: [echoyangya99@163.com](mailto:echoyangya99@163.com).

Qiong Zhao: Institute: Inova Heart and Vascular Institute, Inova Fairfax Hospital, Cardiac Diagnostic, 1st Floor, 3300 Gallow's Road, Falls Church, VA 22042, USA; Tel: 5714722900; Fax: 5714722901; E-mail: [Qiong.Zhao@inova.org](mailto:Qiong.Zhao@inova.org)

Word Count: 12522

**NOTE: This preprint reports new research that has not been certified by peer review and should not be used to guide clinical practice.**

## 1 Abstract

2 **Background:** Bicuspid aortic valve (BAV) is a common congenital disorder. The  
3 relationship between demographic and clinical characteristics, BAV Sievers types, BAV  
4 associated valvulopathy and/or aortopathy and outcomes of aortic valve replacement (AVR)  
5 are interwoven and complicate and have not been fully elucidated. We sought to find these  
6 interactions in a large cohort of BAV patients. **Methods:** We retrospectively reviewed the  
7 data of 992 BAV patients and collected the complete demographic and clinical data (baseline  
8 characteristic, BAV Sievers types, BAV valvulopathy and aortopathy, and pre-, intra- and  
9 postoperative data) to comprehensively analyze these relationships. **Results:** In 992 BAV  
10 patients, sex differences could be found in demography (body surface area [BSA], age and  
11 serum triglyceride), comorbidities, cardiac performance (left ventricular dimension and  
12 ejection fraction,), valvulopathy and aortopathy. Sievers types had the same distribution  
13 among male and female patients, and had an impact on the incidence of valvulopathy and  
14 aortopathy. In the entire cohort, the factors associated with valvulopathy included age, sex,  
15 BSA, systolic blood pressure (SBP) and aortopathy, while factors associated with aortopathy  
16 were age, sex, BSA and valvulopathy. Aortopathy and valvulopathy promoted the occurrence  
17 of each other. Similar risk factors for valvulopathy and aortopathy in male patients were  
18 found. For 658 BAV patients underwent AVR, the preoperative demographic characteristics  
19 were similar to the whole cohort. More males were required to have simultaneous ascending  
20 aortic replacement (AAR). For postoperative early adverse events (EAE) and total ICU  
21 hours > 24 hours, the only predict factors were age and aortic cross clamp (ACC) time, while  
22 LVEF changes (including postoperative LVEF <50%, LVEF increase or decrease more or  
23 less than 5% or 10%) were related to sex, SBP, preoperative LVEF, valvulopathy and  
24 aortopathy, AAR, ACC time. Postoperative length of stay > 7 days could be affected by SBP,  
25 AAR, aortic stenosis and ACC time. **Conclusion:** Our study revealed comprehensive

1 relationships between demographic characteristics, BAV Sievers types, valvulopathy and  
2 aortopathy, and the possible risk factors for adverse outcomes after AVR in BAV patients.  
3 Sex, SBP, age, Sievers types, subtypes and interactions between aortopathy and valvulopathy  
4 differently impact on aortopathy, valvulopathy and the short outcomes of AVR.

5

6 **Keywords**

7

8 Bicuspid aortic valve, Sievers type, aortopathy, valvulopathy, aortic valve replacement

## 1 **Introduction**

2 Bicuspid aortic valve (BAV) is a common congenital disorder with a prevalence rate of 2% in  
3 the general population, with male predominance. These patients have two aortic valves  
4 instead of three as in normal people. While BAV has little impact on the lives of young  
5 patients, over time it may cause severe cardiovascular complications such as aortic valve  
6 stenosis (AS), aortic valve regurgitation (AR) and aorta dilation. Those BAV comorbidities  
7 may require surgical interventions of the valves, such as aortic valve replacement (AVR),  
8 and/or the aorta, <sup>1, 2</sup>.

9  
10 It has been reported BAV Sievers types are associated with some demographic characteristics  
11 such as the sex. Krepp et al. reported that type 1 BAV with fusion between the left and right  
12 coronary cusp (type 1 L - R) was found more frequently in male than in female patients,  
13 whereas type 1 BAV with fusion between the left and noncoronary (type L - N) cusp was  
14 more common in female patients<sup>3</sup>. However, studies by others did not showed this  
15 difference<sup>4, 5</sup>. Demographic characteristics and Sievers types also have effects on BAV  
16 valvulopathy and aortopathy, which are the common complications in BAV patients. For the  
17 valvulopathy, male and female BAV patients have higher incidence AR and AS,  
18 respectively<sup>4, 6</sup>. Age was another independent determinant for BAV valvulopathy. Male BAV  
19 patients more often had moderate/severe AR at a young age, and the occurrence of AR  
20 decreased with age, while female BAV patients with had higher incidence of AS regardless  
21 of age<sup>7</sup>. Valve function was also affected by blood pressure and BAV Sievers type<sup>5</sup>. It  
22 becomes more complicated when considering BAV aortopathy and valvulopathy affects each  
23 other.

24

1 As for BAV aortopathy, age, male and BSA could be independent predictors of ascending  
2 aorta diameter in BAV patients<sup>8</sup>. Male patients have been reported to more frequently have  
3 isolated dilation of the aortic root and diffuse dilation of the aorta when compared with  
4 female patients<sup>4, 6</sup>. Higher BSA, female, age and AS are related to ascending aortic dilation<sup>9</sup>.  
5 Male patients with type 1 L - R are associated with larger sinus of Valsalva (SOV) diameter  
6 and AR, while female patients have a higher prevalence of AS<sup>3</sup>.

7

8 Furthermore, studies showed inconsistent risk factors for outcomes in BAV patients  
9 underwent AVR. One study implied that both short- and long-term outcomes were not  
10 significantly different between males and females<sup>6</sup>, while other suggested that females exhibit  
11 a higher relative risk of death, higher operative risk and longer lengths of hospital stay<sup>10</sup>.  
12 Valvulopathy also affects the postoperative left ventricular ejection fraction (LVEF) as the  
13 BAV-AS patients had a significant increase in LVEF when compared with BAV-AR patients  
14 after AVR<sup>11</sup>. However, it is unclear what are the other factors affecting the improvement or  
15 deterioration of LVEF after AVR.

16

17 To date, comprehensive analyses of the relationships between demographic (e.g., age, sex,  
18 body surface area (BSA)) and clinical (e.g., hypertension, diabetic mellites) characteristics,  
19 BAV Sievers types, incidences of different subtypes valvulopathy and/or aortopathy and their  
20 interactions, and the outcomes of aortic valve replacement (AVR) have not been done. In this  
21 study, we retrospectively reviewed a large number of BAV patients from January 2008 to  
22 December 2017 from our institution to elucidate these relationships.

23

## 1 **Methods**

2 The Ethics Committees of Beijing Anzhen Hospital, Capital Medical University approved  
3 this retrospective study (2017028X) and waived the requirement for written patient informed  
4 consent form.

5

### 6 ***Study Population and protocol***

7 From January 2008 to December 2017, 1166 hospitalized patients from all departments of  
8 Beijing Anzhen Hospital with an echocardiographic diagnosis of BAV were screened and  
9 complete clinical record data were retrospectively reviewed and collected. Nine hundred and  
10 ninety-two BAV patients were enrolled in our study after excluding patients (n = 174) with  
11 preoperative aortic dissection, combined congenital heart disease and/or connective tissue  
12 disorders, including Marfan syndrome and Ehlers-Danlos syndrome. Among these patients,  
13 658 BAV patients underwent AVR. We first analyzed the relationships between demographic  
14 characteristics, BAV Sievers types, overall and different subtypes aortopathy, overall and  
15 different subtypes valvulopathy, and short-term post-operative outcomes (Figure 1).

16

17 Figure 1. Study Design.

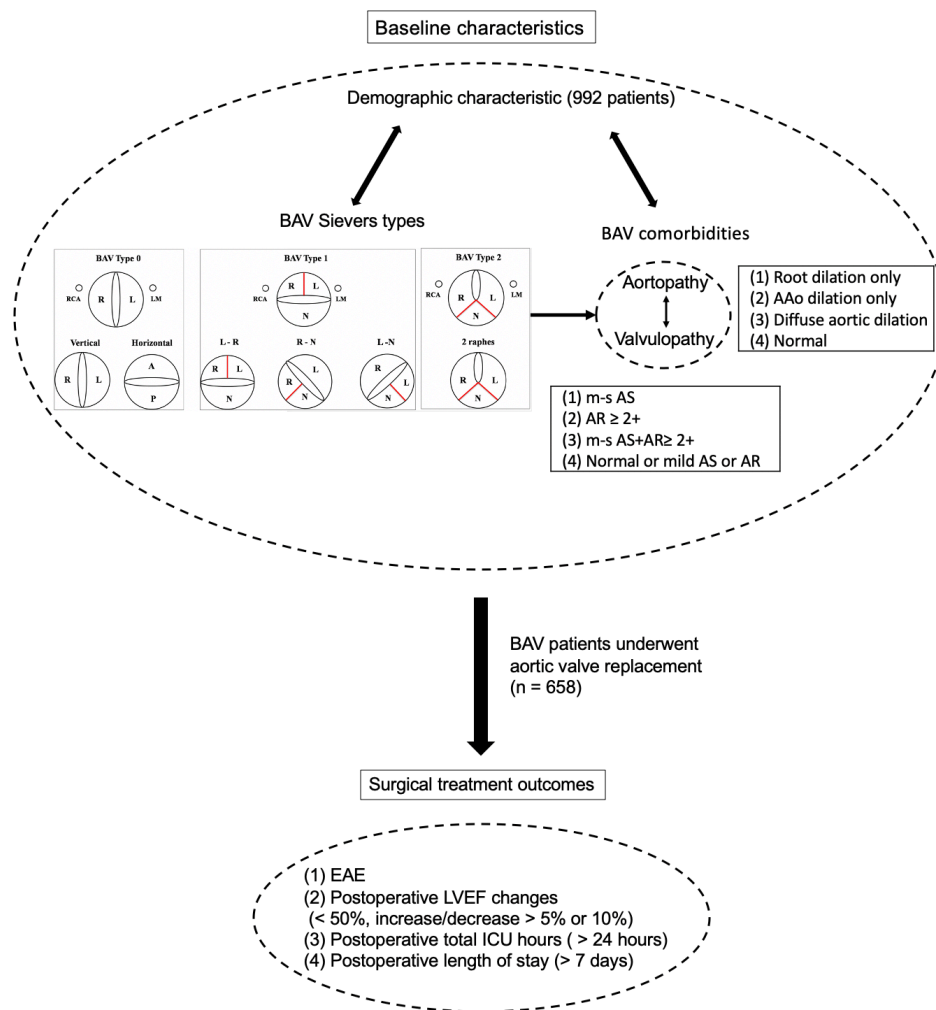

1

2 Abbreviations: BAV: bicuspid aortic valve; Type 0: BAV with no raphe; Type 1 L-R: type 1 BAV with fusion

3 between the left and right coronary cusp; Type 1 R-N: type 1 BAV with fusion between the right and

4 noncoronary cusp; Type 1 L-N: type 1 BAV with fusion between the left and noncoronary cusp; m-s AS:

5 moderate to severe aortic stenosis;  $AR \geq 2+$ : aortic regurgitation  $\geq 2+$ ; AAo: ascending aorta; LVEF: left

6 ventricular ejection fraction; EAE: early adverse event; ICU: intensive care unit.

7

## 8 **Data Collection**

9 Complete clinical record data including demographics, clinical history, medical history,

10 physical examination, imaging examination, laboratory data, and clinical treatments were

11 queried retrospectively. Hypertension was considered as a diagnosis when it was newly

12 diagnosed or treated with medicine within 6 months before echocardiography examination.

1 For patients underwent AVR, additional information including preoperative drug use, intra-  
2 and postoperative parameters, like postoperative early adverse event (EAE), postoperative  
3 LVEF, total intensive care unit (ICU) hours and postoperative length of stay were recorded.  
4 EAE encompasses in-hospital and 30-day mortality, major cardiac events (myocardial  
5 infarction, ventricular fibrillation, acute heart failure, use of circulatory support like intra-  
6 aortic balloon pump [IABP] or extracorporeal membrane oxygenation [ECMO]), acute renal  
7 failure, stroke and reoperation for bleeding).

8

### 9 ***Echocardiography Data***

10 Echocardiography measurements were performed according to the guidelines of American  
11 Society of Echocardiography (ASE), European Society of cardiology (ESC) and American  
12 College of Cardiology/American Heart Association (ACC/AHA)<sup>12-14</sup>. All patients went  
13 through comprehensive transthoracic echocardiography evaluation, and those with the  
14 diagnosis of BAV by echocardiography were included for this study. BAV was diagnosed by  
15 parasternal long- and short-axis view, showing the existence of only 2 commissures in  
16 systole, and was classified based on the Sievers classification system (Sievers types)<sup>15</sup> as type  
17 0 (BAV with no raphe), type 1 L-R (BAV with fusion between the left and right coronary  
18 cusp), type 1 R-N (BAV with fusion between the right and noncoronary cusp), type 1 L-N  
19 (BAV with fusion between the left and noncoronary cusp). There was no type 2 BAV patient  
20 in our cohort.

21

22 Valvular dysfunction (valvulopathy, including AS and/or AR ) was determined with  
23 hemodynamic measurements and the degrees of AS and AR were scored based on the ESC  
24 and ACC/AHA guidelines for the management of valvular heart disease<sup>13, 14, 16</sup>. Valvular  
25 function was categorized into four conditions: (1) moderate to severe aortic valve stenosis



1 (m-s AS) only, (2) aortic valve regurgitation  $\geq 2+$  (AR  $\geq 2+$ ) only, (3) m-s AS + AR  $\geq 2+$ ,  
2 (4) mild AS and/or mild AR or normal <sup>17</sup>.

3  
4 For the evaluation of aortopathy, SOV and ascending aorta (AAo) were measured using the  
5 leading edge to leading edge technique in the parasternal long axis view perpendicular to the  
6 centerline of the aorta. BSA indexed SOV and AAo dimensions were calculated. The dilation  
7 of SOV or AAo was defined as the diameter  $\geq 40$ mm according to the guidelines<sup>18, 19</sup> and  
8 literature<sup>20</sup>. The classification of BAV aortopathy as follow: (1) aortic root (comprising of the  
9 SOV, aortic valve and coronary ostia) dilation only, (2) AAo dilation only, (3) diffuse aortic  
10 dilation (i.e., dilation of both aortic root and AAo) and (4) no dilation (normal)<sup>21</sup>.

## 11 12 ***Statistical Analysis***

13 Continuous variables, expressed as means  $\pm$  standard deviation (SD) in case of normally  
14 distributed variables or as medians (interquartile ranges (IQR), i.e., median (Q1, Q3), were  
15 compared using unpaired Student's *t* test or *Mann-Whitney U* test or one-way analysis of  
16 variance where appropriate. Categorical variables, expressed as numbers and/or percentages,  
17 were compared using the *Chi-square* or *Fisher's* exact tests.

18  
19 The hazard ratios (HR) of age, sex, valvulopathy and aortopathy and other parameters for  
20 postoperative EAE were calculated using proportional Cox hazard models. The odds ratios  
21 (OR) of basic clinical parameters, like age, sex, BSA, and BAV Sievers type, BAV-induced  
22 comorbidities (including valvulopathy and aortopathy), were analyzed with multivariable  
23 logistic regression models adjusted for significant covariables in univariate analysis with  
24 backward stepwise method, to investigate factors affecting valvulopathy, aortopathy and  
25 short-term post-operative outcomes. Statistical analyses were performed using SPSS version

1 25.0 (IBM Corp., Armonk, N.Y., USA). All tests were 2-sided and a *P* value of < 0.05 was  
2 considered statistically significant.

### 3 **Results**

4

#### 5 *Sex differences in demography, comorbidities, cardiac performance, Sievers types,* 6 *valvulopathy and aortopathy in BAV patients*

7

8 We enrolled 992 patients according to our inclusion criteria, in which 734 (74.0%) patients  
9 were male, and 258 (26.0%) patients were female, agreeing with BAV's predominance in  
10 males<sup>4</sup>. Females were about 3.6 years older than males when first diagnosed with BAV in our  
11 institution. Weight, height and BSA were greater in males. The prevalence of tobacco use  
12 was higher in male patients. Male BAV patients had higher incidence of hypertension. Serum  
13 triglyceride was higher in male patients, but female patients had higher levels of total  
14 cholesterol, high-density lipoprotein (HDL) and low-density lipoprotein (LDL). LVEDD and  
15 LVESD were significantly smaller in female (LVEDD,  $57.54 \pm 11.90$  mm vs.  $47.67 \pm 6.92$   
16 mm,  $P < 0.001$ ; LVESD,  $39.05 \pm 10.62$  mm vs.  $30.88 \pm 6.61$  mm,  $P < 0.001$ ) while LVEF  
17 was lower in males ( $59.79 \pm 10.05$  % vs.  $63.74 \pm 8.67$  %,  $P < 0.001$ ) (Table 1).

18

19 In all 992 patients, the most common BAV Sievers types were type 1 L - R (59.2%), followed  
20 by type 0 (24.4%), type 1 R - N (13.9%), and type 1 L - N (2.5%). There was no sex  
21 difference in the distribution of Sievers types (Table 1 and Table 2).

22

23 BAV strongly predisposes the patients to aortic and/or valvular diseases. The percentage of  
24 patients with at least of one form of valvulopathy and/or aortopathy in our cohort was 92.6%

1 and 53.7% had both one form of aortopathy and one form of valvulopathy. Males had higher  
2 percentage of at least one form of valvulopathy or aortopathy, and higher percentage of  
3 combined valvulopathy and aortopathy (Table 1).

4

5 The overall prevalence of valvulopathy in all BAV patients was high (73.4%), among which  
6 75.4% were males and 24.6% were females. Among all BAV patients, males were more  
7 frequently having AR  $\geq 2+$  only than females (39.0% vs. 12.8%,  $P < 0.001$ ), whereas females  
8 were prone to have m-s AS only (45.7% vs 21.3%,  $P < 0.001$ ) (Table 1).

9

10 As shown in Table 1, aortopathy was common in our cohort of BAV patients (73.0%) and  
11 most common aortopathy was AAo dilation only (50.1%), followed by diffuse aortic dilation  
12 (19.9%), and root dilation only (3.0%). Compared to females, male patients showed higher  
13 incidence of aortic diffuse dilation (25.3% vs. 4.3%,  $P < 0.001$ ) and root dilation (3.8% vs.  
14 0.8%,  $P = 0.014$ ); , while female patients had greater incidence of AAo dilation only (61.2%  
15 vs. 46.2%,  $P < 0.001$ ) (Table 1). The linear dimension of SOV, AAo, and BSA indexed SOV  
16 were significantly larger in males when compared with females (SOV,  $36.51 \pm 6.75\text{mm}$  vs.  
17  $31.16 \pm 4.90\text{mm}$ ,  $P < 0.001$ ; SOV/BSA,  $20.13 \pm 3.91\text{mm/m}^2$  vs.  $19.37 \pm 3.28\text{mm/m}^2$ ,  $P =$   
18  $0.003$ ; AAo,  $44.33 \pm 8.67\text{mm}$  vs.  $42.81 \pm 8.44\text{mm}$ ,  $P = 0.016$ ), but BSA indexed AAo was  
19 significantly larger in females instead ( $24.47 \pm 5.05$  vs.  $26.65 \pm 5.52$ ,  $P < 0.001$ ), which  
20 indicated that females had larger AAo diameter when shared the same BSA as males.

21

22 ***The association between different Sievers types with clinical characteristics, valvulopathy***  
23 ***and aortopathy in BAV patients***

24

25 Patients with different BAV Sievers types were equipped with distinct clinical characteristics

1 including DBP, SBP, LVEDD, LVESD, and BSA normalized LVEDD or LVESD. Patients  
2 with type 0 Sievers type had the highest diastolic blood pressure (DBP), while type 1 L-N  
3 had lowest SBP and DBP. Type 1 L-R and type 1 R-N had larger LV diameter than type 0  
4 and type L-N. Type 1 L-N also had the smallest LVEDD/BSA (Table 2).

5  
6 In our cohorts, Sievers types had an impact on the incidence of valvulopathy and aortopathy.  
7 For valvulopathy, the incidence of  $AR \geq 2+$  was greater in type 1 L-R (37.3%) and type 1 R-  
8 N (34.8%) than in type 0 (19.4%) and type 1 R-N (20.0%). Interestingly, type 0 and type 1 R-  
9 N had most normal or mild AS or AR (Table 2). For BAV aortopathy, type 1 L-R and type 1  
10 L-N had larger SOV diameter and BSA indexed SOV than type 0 and type 1 R-N. Type 0 and  
11 Type 1 R-N had higher frequency of AAo dilation only than type 1 L-R and type 1 L-N,  
12 which on the contrary had lower incidence of diffuse aortic dilation than type 0 and type 1 R-  
13 N (table 2). Type 1 L-R and type 1 R-N had higher percentage of at least one form of  
14 valvulopathy or aortopathy, and higher percentage of combined valvulopathy and aortopathy  
15 (Table 2).

16

### 17 **Risk factors for valvulopathy in all, male and female BAV patients**

18

19 We further identified independent risk factors for all these three types of valvulopathy, m-s  
20 AS only,  $AR \geq 2+$  only and both in all, male and female BAV patients, by adjusting for  
21 confounders. In the whole cohort, for m-s AS only, age predicted a risk while higher BSA  
22 and diffuse aortic dilation strongly decreased the risk of AS. For  $AR \geq 2+$  only, higher SBP  
23 (instead of hypertension history) and male increase its incidence, while type 1 L-R might be  
24 another potential risk factor (OR = 2.943,  $P = 0.066$ ). As for m-s AS+ $AR \geq 2+$ , greater BSA  
25 greatly decreased the risk, while AAo dilation only, diffuse aortic dilation and male were the

1 risk factors (Table 3 and supplementary Table 1).

2

3 We further looked into the risk and protective factors for BAV associated valvulopathy in  
4 male and female BAV patients. For male BAV patients, age was a predict factor (OR =  
5 1.046,  $P < 0.001$ ) for m-s AS only, while higher BSA (OR = 0.085,  $P = 0.001$ ) decreased the  
6 risk of it. Higher SBP (OR = 1.018,  $P = 0.004$ ) increased the incidence of AR  $\geq 2+$  only  
7 (Table 3 and supplementary Table 2). For m-s AS+AR  $\geq 2+$ , higher BSA decreased the risk  
8 (OR = 0.049,  $P < 0.001$ ).

9

10 There were interactions between valvulopathy and aortopathy in males: Males were prone to  
11 have diffuse aortic dilation (OR = 3.868,  $P = 0.001$ ) (Table 4). Diffuse aortic dilation (OR =  
12 0.350,  $P < 0.011$ ) decreased the risk of m-s AS only; AAo dilation only (OR = 2.164,  $P =$   
13 0.034) and diffuse aortic dilation (OR = 2.837,  $P = 0.010$ ) were the risk factors for m-s  
14 AS+AR  $\geq 2+$ . In females, age is a predictor for m-s AS only (OR = 1.033,  $P = 0.011$ ) and m-  
15 s AS + AR  $\geq 2+$  (OR = 1.045,  $P = 0.033$ ), while higher BSA decrease the risk for m-s AS +  
16 AR  $\geq 2+$  (OR = 0.036,  $P = 0.045$ ) (Table 3). For other factors, the numbers of affected female  
17 patients were too few and thus we could not assess the risk of them.

18

### 19 ***Risk factors for BAV aortopathy in all, male and female BAV patients***

20

21 In the entire cohort, BSA was the only risk factor for all forms of aortopathy (aortic root  
22 dilation only, OR = 21.551,  $P = 0.020$ ; AAo dilation only, OR = 5.751,  $P = 0.001$ ; diffuse  
23 aortic dilation, OR = 37.554,  $P < 0.001$ ). Age was a risk factor for AAo dilation only and  
24 diffuse aortic dilation in the whole cohort (AAo dilation only, OR = 1.037,  $P < 0.001$ ; diffuse

1 aortic dilation, OR = 1.050,  $P < 0.001$ ) and male patients (AAo dilation only, OR = 1.033,  $P$   
2  $< 0.001$ ; diffuse aortic dilation, OR = 1.049,  $P < 0.001$ ). BSA was also the only risk factor for  
3 all three forms of aortopathy in males (aortic root dilation only, OR = 18.416,  $P = 0.036$ ;  
4 AAo dilation only, OR = 7.243,  $P = 0.001$ ; diffuse aortic dilation, OR = 45.402,  $P < 0.001$ ),  
5 but not in females. In the whole cohort and males, valvulopathy affected the aortopathy: m-s  
6 AS only decreased the risk for diffuse aortic dilation in the whole study cohort (OR = 0.242,  
7  $P < 0.001$ ) and males (OR = 0.338,  $P < 0.001$ ), while m-s AS + AR  $\geq 2+$  increase the risk for  
8 the whole cohort (OR = 2.402,  $P = 0.015$ ) and males (OR = 2.694,  $P = 0.013$ ). (Table 4). For  
9 females, age was a risk factor for AAo dilation only (OR = 1.047,  $P < 0.001$ ). Because the  
10 numbers of female patients associated with some factors were limited, we could not perform  
11 additional analysis.

12

13 ***Pre-, intra- and post- operative characteristics of all, male and female BAV patients***  
14 ***underwent AVR***

15 The preoperative demographic characteristics for BAV patients underwent AVR were similar  
16 as the whole cohort. In 658 BAV patients underwent AVR, 75.1% were males, while 24.9%  
17 were females. While most pre-operative demographic and clinical characteristics were similar  
18 between male and female patients, males were younger ( $48.74 \pm 12.73$  years vs.  $55.34 \pm$   
19  $11.20$  years,  $P < 0.001$ ) and had lower LVEF ( $60.67 \pm 8.57$  % vs.  $63.67 \pm 8.18$  %,  $P <$   
20  $0.001$ ), suggesting more need of AVR in male patients. Males also had lower DBP ( $70.94 \pm$   
21  $13.35$  mmHg vs.  $73.30 \pm 11.07$  mmHg,  $P = 0.026$ ), greater BSA ( $1.82 \pm 0.16$  m<sup>2</sup> vs.  $1.62 \pm$   
22  $0.15$  m<sup>2</sup>,  $P < 0.001$ ), higher frequency of AR  $\geq 2+$  only (223 [45.1%] vs. 25 [15.2%],  $P <$   
23  $0.001$ ) and aortic root dilation only (19 [3.8%] vs. 1 [0.6%],  $P = 0.036$ ) and diffuse aortic  
24 dilation (147 [29.8%] vs. 7 [4.3%],  $P < 0.001$ ). Females were more likely to have m-s AS  
25 only (119 [24.1%] vs. 101 [61.6%],  $P < 0.001$ ) and AAo dilation only (226 [45.7%] vs. 106

1 [64.6%],  $P < 0.001$ ).

2

3 More male patients were required to have simultaneous ascending aortic replacement when  
4 they underwent AVR (248 [50.2%] vs. 62 [37.8%],  $P = 0.006$ ), again suggesting more severe  
5 conditions in male BAV patients.

6

### 7 ***Factors related to postoperative EAE, LVEF and LVEF changes after AVR***

8 Age (HR = 1.030;  $P = 0.002$ ) and longer aortic cross clamp (ACC) time (HR = 1.012,  $P <$   
9  $0.001$ ) were predict factors for EAE. Additionally, we used LVEF, total ICU hours, and  
10 postoperative hospital stay as indices of postoperative outcomes. It has been reported that  
11 post-operative LVEF<50% is associated adverse long-term prognosis<sup>22</sup>. Sex was a major  
12 factor affecting outcomes. Postoperatively, on average LVEF decreased in all, male and  
13 female patients compared to preoperative values and was lower in males than females ( $57.03$   
14  $\pm 10.11\%$  vs.  $60.83 \pm 10.66\%$ ,  $P < 0.001$ ). Female patients had longer total ICU hours (21  
15 [19, 29.74] vs. 21 [18, 26],  $P = 0.042$ ), and higher percentage of patients needing total ICU  
16 hours > 24 hours (38.4% vs. 29.8%,  $P = 0.039$ ). Males had higher percentage of  
17 postoperative LVEF < 50% and lower percentage of postoperative LVEF increase > 10%.  
18 Multivariable logistic regression confirmed that male was the risk factor for postoperative  
19 LVEF < 50% (OR = 3.072,  $P = 0.033$ ). Females stayed in hospital after surgery longer than  
20 males and had higher frequency of postoperative length of stay > 7 days. There were 13.7%  
21 patients showing EAE but the incidence of EAE was not differing significantly between sex  
22 (HR = 1.213,  $P = 0.441$ ) (Table 5).

23

24 Diffuse aortic dilation (OR = 2.899,  $P = 0.013$ ), ascending aortic replacement (OR = 2.154,  $P$   
25 = 0.016) and longer aortic cross clamp time (OR = 1.012,  $P < 0.001$ ) were the risk factors for

1 postoperative LVEF < 50%, while higher preoperative LVEF is the protective factor (OR =  
2 0.873,  $P < 0.001$ ) (table 6). Age (OR = 1.018,  $P = 0.015$ ) and longer aortic cross clamp  
3 (ACC) time (OR = 1.015,  $P < 0.001$ ) were the risk factors for total ICU hours > 24 hours.  
4 Higher SBP (OR = 0.990,  $P = 0.047$ ) and accompanied ascending aortic replacement (OR =  
5 0.552,  $P = 0.001$ ) decrease the possibility of postoperative length of stay > 7 days, while m-s  
6 AS only (OR = 1.846,  $P = 0.027$ ) and longer ACC time (OR = 1.005,  $P = 0.021$ ) increased  
7 the risk of staying more days in the hospital.

8  
9 Furthermore, we analyzed the factors for postoperative LVEF improvements or deterioration  
10 by LVEF changes of 5% or 10% (table 7). Higher SBP (OR = 0.984,  $P = 0.017$ ) and  
11 preoperative LVEF (OR = 0.880,  $P < 0.001$ ), and accompanied ascending aortic replacement  
12 (OR = 0.604,  $P = 0.037$ ) might hinder the patients from LVEF improvement by > 5%, while  
13 patients with m-s AS only (OR = 2.559,  $P = 0.018$ ) were prone to have postoperative LVEF  
14 increase > 5%. Higher preoperative LVEF (OR = 0.855,  $P < 0.001$ ) also decrease the chance  
15 of LVEF improvement by > 10%. Higher preoperative LVEF and AR  $\geq 2+$  only were risk  
16 factors for postoperative LVEF decrease > 5% (preoperative LVEF, OR = 1.120,  $P < 0.001$ ;  
17 AR  $\geq 2+$  only, OR = 2.486,  $P = 0.001$ ) or decrease > 10% (preoperative LVEF, OR = 1.110,  
18  $P < 0.001$ ; AR  $\geq 2+$  only, OR = 3.172,  $P = 0.001$ ), while m-s AS only (OR = 0.437,  $P =$   
19 0.030) was the protective factor for postoperative LVEF decrease > 10%. (table 7).

20

## 21 **Discussion**

22

23 In this study, we performed a comprehensive evaluation of the relationships among  
24 demographic and clinical characteristics, BAV Sievers types, valvulopathy and aortopathy,



1 and the risk/protective factors for outcomes after aortic valve replacement (AVR) in BAV  
2 patients, with our large retrospective cohort of BAV patients. Our study unveiled multiple  
3 previously unrecognized interwoven interactions between some demographic characteristics,  
4 BAV Sievers types, and operational outcomes.

5

6 *Demographic characteristics' effects on BAV associated valvulopathy and aortopathy:*

7 Though it is well known that BAV is a male predominant entity<sup>4,23</sup>, as also shown by our  
8 study, whether there are sex differences in BAV Sievers types, valvulopathy, aortopathy and  
9 operational outcomes has been controversial. Our study demonstrated that type 1 L-R was  
10 the most prevalent configuration without sex difference in Sievers types, agreeing with the  
11 reports by Kong et al.<sup>4</sup> and by Lee et al<sup>5</sup>. On the contrary, Roman et al. reported that among  
12 424 unoperated BAV patients, males had more frequently type 1 L - R than females (81.5%  
13 vs. 69.0%,  $P = 0.03$ ), whereas type 1 L - N was more common in females (18.5% vs. 31.0%,  
14  $P = 0.03$ )<sup>3</sup>. In addition, our cohort showed that male BAV patients were younger, with larger  
15 BSA, LVEDD and LVESD, and lower LVEF than females and had more need for AVR or  
16 AVR+AAR, suggesting faster development and worse outcomes of aortopathy and  
17 valvulopathy in males.

18

19 *Influences of Demographic and clinical characteristics, and BAV Sievers types on aortopathy*  
20 *and valvulopathy in BAV patients:*

21 As BAV is associated with adverse aortopathy and valvulopathy which have significant  
22 impact on the health of these patients, it is necessary to test if the demographic and clinical  
23 characteristics, like age, sex, BSA and blood pressure, and Sievers types were independent  
24 predictors for BAV valvulopathy, aortopathy. One advantage of our study is that the large  
25 number of patients and comprehensive dataset enabled us to analyze risk/protective factors of

1 aortopathy and valvulopathy in subpopulations such as male patients or patients with specific  
2 comorbidities.

3 Sievers types and sex may affect aortopathy. Sievers et al<sup>24</sup> showed that AAO dilation was  
4 observed more often in BAV type 1 L-R and type 0 than in other Sievers types. Aortic root  
5 dilation was more often in type 0 and type 1 R-N, while diffuse aortic dilation was more  
6 frequent in type 1 L-R. Our results also showed patients with type 1 L-R had the highest  
7 proportion of diffuse aortic dilation, but we found that type 1 R-N but not type 0 was more  
8 likely to have AAO dilation only, which was different from Sievers' result. Our discovery that  
9 the frequency of m-s AS only was similar in different Sievers types was also different from  
10 the results reported by Sievers et al<sup>24</sup>. These differences could be due to the fact that different  
11 BAV fusion pattern may lead to the hemodynamic changes in aorta in distinct ways, resulting  
12 in different types of aortopathy<sup>25, 26</sup>. In terms of the effects of sex, Kong et al. pointed out  
13 that males showed more frequent aortic SOV dilation compared with females<sup>4</sup>. Andrei et al.  
14 reported males with BAV had larger aortic dimension but did not mention which segment of  
15 the aorta was dilated<sup>6</sup>. In our study, we examined aortic dilation both at the root and  
16 ascending segments. The diameter of SOV, AAO, BSA indexed SOV were larger in males,  
17 but normalized AAO by BSA was larger in females. Aortic root dilation only or diffuse aortic  
18 dilation was more frequently found in males while females tended to have more AAO  
19 dilation. In addition, in our whole cohort, higher BSA, age, m-s AS+AR  $\geq 2+$  were the risk  
20 factors for all or some types of aortopathy but m-s AS only was a protective factor for diffuse  
21 aortic dilation. Male shared similar prediction factors of aortopathy with the whole cohort.  
22 But in females, only age could be determined as an independent predictor for AAO dilation  
23 only.

24

1 Valvulopathy was in 73.4% of BAV patients in our study cohort (m-s AS and/or AR  $\geq 2+$ ).  
2 We found that male BAV patients were present more often with m-s AR only at a young age,  
3 while female BAV patients had more frequent AS, consistent with the result of a Krepps's  
4 study<sup>3</sup> and Kong's study<sup>4</sup>. Kong's study only examined BAV Sievers types and sex on types  
5 of valvulopathy and concluded that only sex was related. Our data presented a much more  
6 complex situation: for the whole cohort, age is the risk factor for m-s AS only but higher  
7 BSA and diffuse aortic dilation were the protective factors. Higher SBP and male would  
8 increase the risk of AR  $\geq 2+$  only. For m-s AS +AR  $\geq 2+$ , AAO dilation, diffuse aortic  
9 dilation and male were the risk factor while higher BSA would protect the patients from m-s  
10 AS +AR  $\geq 2+$ . The risk or protect factors of valvulopathy in male were similar as for whole  
11 cohort. But in females, the only identified risk factor for m-s AS only was age, while age and  
12 BSA were independent determinants for m-s AS +AR  $\geq 2+$ .

13

#### 14 Biological mechanisms for aortopathy and valvulopathy associated with BAV

15 There were two main hypotheses to explain aortic dilation: hemodynamic theory and gene  
16 theory<sup>27-29</sup>. In AS patient, the aortic dilation could be induced by valve related flow  
17 turbulence (hemodynamic theory), while AR could be the results of aortic root dilation  
18 caused by related gene mutations (gene theory), as suggested by Sievers et al<sup>24</sup>. In our study,  
19 we showed sex difference in aortopathy though not the same as previously reported,  
20 consistent with the "X chromosome protection theory"<sup>30-32</sup> Further investigation is needed to  
21 explain these sex differences in BAV aortopathy.

22

23 The mechanisms for BAV valvulopathy are not clear. Gene mutations or expression changes  
24 causes BAV Sievers types, which may be directly associated with different subtypes of  
25 valvulopathy<sup>33</sup>. In our study, male sex is also related to AR  $\geq 2+$  or m-s AS+ AR  $\geq 2+$ ,

1 suggesting some genetic influence on the development of specific types of valvulopathy.

2

3 *Who can obtain more benefits or are exposed to more risks to surgical interventions in BAV*  
4 *patients?*

5 Our study has suggested that male BAV patients advance to more severe (e.g., lower LVEF)  
6 conditions that even requires surgical interventions at younger ages. So, it seems that male  
7 BAV patients should benefit more from surgical interventions. However, we found no  
8 significant difference in ACC time and EAE between sex though females needed longer total  
9 ICU hours and postoperative length of stay. In contrast, Andrei and colleagues implied that  
10 females had higher risk for in-hospital mortality and longer ICU median hours of stay, longer  
11 ACC times and higher preoperative LVEF<sup>6</sup>. Another study analyzed 3 cohort (community  
12 cohort, tertiary clinical referral cohort, and surgical referral cohort), and found that in surgical  
13 referral cohort, females exhibited a higher relative risk of death<sup>10</sup>. We found that age and  
14 longer ACC time were risk factors for EAE and total ICU hours > 24 hours.

15 We further evaluated the benefits and risks of surgical interventions by examining the more  
16 subtle but critical parameters, postoperative LVEF < 50% and LVEF change by operation  
17 and total post-operation stay. Postoperative LVEF < 50% could be a predictor for 5-year  
18 survival for AVR in BAV patients<sup>22</sup>. Male, lower preoperative LVEF, accompanied  
19 ascending aortic replacement and longer ACC time were risk factor of postoperative LVEF <  
20 50%. However, the lower preoperative LVEF was also the predictor for postoperative LVEF  
21 increase. AS only patients were prone to have LVEF increase after surgery which agrees the  
22 AVR in BAV/TAV patients<sup>11, 34</sup> probably due to the decrease of afterload after the removal of  
23 stenosed AV. AR patients were prone to have postoperative LVEF decrease as reported by  
24 Disha et al.<sup>11</sup>, which could reflect no need of high LVEF after regurgitation correction. For

1 longer postoperative stay (>7 days), AS, age and longer ACC time were risk factors, but  
2 accompanied ascending aortic replacement was shown to be a protective factor.

3

#### 4 **Study limitations**

5 The principal limitation of this study was its single center based retrospective study, and the  
6 short follow-up time after surgeries.

7 This study is based on a single center though our patient number is large. Also, we only  
8 analyzed hospitalized patients, and among them, surgical inpatients occupy a large  
9 proportion. This might lead to a selection bias. Besides, the patients enrolled in this study  
10 were all Chinese (Asians), and it was known that there were some anatomical and genetic  
11 differences between American, European and Asian patients.<sup>35</sup> By far, only few studies were  
12 available for the characterization of BAV patients of Chinese or Asians<sup>35-37</sup>. We have already  
13 registered a multicenter study on BAV (registration number: ChiCTR-RRC-17013678) which  
14 will enable us to further test our findings and to carry out the long-term follow-up in the  
15 future.

16 There were several data analyses that cannot be done because of the limited number of  
17 patients in subgroups such as some Sievers types or a subtype of aortopathy in females, AAo  
18 dilation only in females, m-s AS +AR $\geq$  2+ and root dilation only in whole cohort and males.

19

#### 20 **Conclusion**

21 Our study provided the evidence for comprehensive relationships between demographic and  
22 clinical characteristics, BAV Sievers types, valvulopathy and aortopathy, and the possible  
23 risk factors for adverse outcomes after AVR in BAV patients. Sex, SBP, age, Sievers types,

- 1 interactions between aortopathy and valvulopathy differently impact on aortopathy,
- 2 valvulopathy and the short outcomes of AVR.
- 3

1 Author list:

2

3 Yijia Li

4 Department of Echocardiography, Beijing Anzhen Hospital, Capital Medical University, and

5 Beijing Institute of Heart Lung and Blood Vessel Diseases

6 Department of Physiology & Cardiovascular Research Center, Temple University School of

7 Medicine

8 E-mail: [tuk54304@temple.edu](mailto:tuk54304@temple.edu)

9 phone: +1 2677522688

10

11 Qiong Zhao:

12 Qiong Zhao: Institute: Inova Heart and Vascular Institute, Inova Fairfax Hospital, Cardiac Diagnostic,

13 1st Floor, 3300 Gallow's Road, Falls Church, VA 22042, USA;

14 E-mail: [Qiong.Zhao@inova.org](mailto:Qiong.Zhao@inova.org)

15 Phone: 5714722900

16

17 Yue Qi:

18 Department of Epidemiology, Beijing Anzhen Hospital, Capital Medical University, and

19 Beijing Institute of Heart Lung and Blood Vessel Diseases

20 E-mail: [qiyue\\_bjcn@163.com](mailto:qiyue_bjcn@163.com)

1 phone: +86 13811106169

2

3 Yichen Qu

4 Department of Echocardiography, Beijing Anzhen Hospital, Capital Medical University, and

5 Beijing Institute of Heart Lung and Blood Vessel Diseases

6 E-mail: [quyichen439@163.com](mailto:quyichen439@163.com)

7 phone: +86 15959146872

8

9

10 Akshay Kumar

11 Address: Department of Cardiothoracic Surgery, Medanta Hospital, Gurugram, India, Medanta

12 Hospital, Islampur Colony, Sector 38, Gurugram, India 122001

13 E-mail: [drakshay82@gmail.com](mailto:drakshay82@gmail.com)

14 phone: 843-870-3792

15

16 Ya Yang:

17 Department of Echocardiography, Beijing Anzhen Hospital, Capital Medical University, and

18 Beijing Institute of Heart Lung and Blood Vessel Diseases

19 E-mail: [echoyangya6666@163.com](mailto:echoyangya6666@163.com)

20 phone: +86 18911662958



1

2 Xiongwen Chen:

3 Department of Physiology & Cardiovascular Research Center, Temple University School of

4 Medicine

5 E-mail: [xchen001@temple.edu](mailto:xchen001@temple.edu)

6 Phone: +1 215-707-3542

7

1 Acknowledgment:

2 Dr. Li had full access to all of the data in the study and takes responsibility for the integrity of  
3 the data and the accuracy of the data analysis. Dr. Qi and Qu carried out the statistical  
4 analysis; Dr. Zhao helped with study concept and design. Dr. Chen and Yang proposed the  
5 study directions, suggested critical analyses, and performed critical revision.

6 Funding: None

7 Disclosure: There are no relationships with industry.

8

## 1 Reference

- 2 1. Borger MA, Fedak PWM, Stephens EH, Gleason TG, Girdauskas E, Ikonomidis JS,  
3 Khoynzhad A, Siu SC, Verma S, Hope MD, Cameron DE, Hammer DF, Coselli JS, Moon MR,  
4 Sundt TM, Barker AJ, Markl M, Della Corte A, Michelena HI and Elefteriades JA. The  
5 American Association for Thoracic Surgery consensus guidelines on bicuspid aortic valve-  
6 related aortopathy: Executive summary. *J Thorac Cardiovasc Surg.* 2018;156:473-480.
- 7 2. Nishimura RA, Otto CM, Bonow RO, Carabello BA, Erwin JP, 3rd, Guyton RA, O'Gara  
8 PT, Ruiz CE, Skubas NJ, Sorajja P, Sundt TM, 3rd and Thomas JD. 2014 AHA/ACC Guideline  
9 for the Management of Patients With Valvular Heart Disease: a report of the American  
10 College of Cardiology/American Heart Association Task Force on Practice Guidelines.  
11 *Circulation.* 2014;129:e521-643.
- 12 3. Krepp JM, Roman MJ, Devereux RB, Bruce A, Prakash SK, Morris SA, Milewicz DM,  
13 Holmes KW, Ravekes W, Shohet RV, Pyeritz RE, Maslen CL, Kroner BL, Eagle KA, Preiss L,  
14 Gen TACI and Asch FM. Bicuspid and unicuspid aortic valves: Different phenotypes of the  
15 same disease? Insight from the GenTAC Registry. *Congenit Heart Dis.* 2017.
- 16 4. Kong WK, Regeer MV, Ng AC, McCormack L, Poh KK, Yeo TC, Shanks M, Parent S,  
17 Enache R, Popescu BA, Yip JW, Ma L, Kamperidis V, van der Velde ET, Mertens B, Ajmone  
18 Marsan N, Delgado V and Bax JJ. Sex Differences in Phenotypes of Bicuspid Aortic Valve and  
19 Aortopathy: Insights From a Large Multicenter, International Registry. *Circ Cardiovasc*  
20 *Imaging.* 2017;10.
- 21 5. Lee SY, Shim CY, Kim D, Cho I, Hong GR, Ha JW and Chung N. Factors Determining  
22 Aortic Valve Dysfunction in Korean Subjects With a Bicuspid Aortic Valve. *Am J Cardiol.*  
23 2017;119:2049-2055.
- 24 6. Andrei AC, Yadlapati A, Malaisrie SC, Puthumana JJ, Li Z, Rigolin VH, Mendelson M,  
25 Clennon C, Kruse J, Fedak PW, Thomas JD, Higgins JA, Rinewalt D, Bonow RO and McCarthy  
26 PM. Comparison of outcomes and presentation in men-versus-women with bicuspid aortic  
27 valves undergoing aortic valve replacement. *Am J Cardiol.* 2015;116:250-5.
- 28 7. Ren X, Li F, Wang C, Hou Z, Gao Y, Yin W and Lu B. Age- and Sex-Related Aortic  
29 Valve Dysfunction and Aortopathy Difference in Patients with Bicuspid Aortic Valve. *Int Heart*  
30 *J.* 2019;60:637-642.
- 31 8. Kerneis C, Pasi N, Arangalage D, Nguyen V, Mathieu T, Verdonk C, Codogno I, Ou P,  
32 Duval X, Tubiana S, Cimadevilla C, Vahanian A and Messika-Zeitoun D. Ascending aorta  
33 dilatation rates in patients with tricuspid and bicuspid aortic stenosis: the  
34 COFRASA/GENERAC study. *Eur Heart J Cardiovasc Imaging.* 2018;19:792-799.
- 35 9. Nishi H, Sakaguchi T, Miyagawa S, Yoshikawa Y, Fukushima S, Yoshioka D, Ueno T,  
36 Kuratani T and Sawa Y. Factors affecting a dilated ascending aorta in patients with bicuspid  
37 aortic valve: the relevance of valve anatomy, body size and age. *Surg Today.* 2014;44:1483-  
38 9.
- 39 10. Michelena HI, Suri RM, Katan O, Eleid MF, Clavel MA, Maurer MJ, Pellikka PA,  
40 Mahoney D and Enriquez-Sarano M. Sex Differences and Survival in Adults With Bicuspid  
41 Aortic Valves: Verification in 3 Contemporary Echocardiographic Cohorts. *J Am Heart Assoc.*  
42 2016;5.
- 43 11. Disha K, Espinoza A, Rouman M, Secknus MA, Kuntze T and Girdauskas E. Long-  
44 Term Recovery of Reduced Left Ventricular Ejection Fraction after Aortic Valve Replacement  
45 in Patients with Bicuspid Aortic Valve Disease. *Thorac Cardiovasc Surg.* 2016;64:418-26.
- 46 12. Recommendations for Cardiac Chamber Quantification by Echocardiography in  
47 Adults: An Update from the American Society of Echocardiography and the European  
48 Association of, Cardiovascular Imaging. *European heart journal cardiovascular Imaging.*  
49 2016;17:412.

- 1 13. Cheitlin MD, Alpert JS, Armstrong WF, Aurigemma GP, Beller GA, Bierman FZ,  
2 Davidson TW, Davis JL, Douglas PS and Gillam LD. ACC/AHA Guidelines for the Clinical  
3 Application of Echocardiography. A report of the American College of Cardiology/American  
4 Heart Association Task Force on Practice Guidelines (Committee on Clinical Application of  
5 Echocardiography). Developed in collaboration with the American Society of  
6 Echocardiography. *Circulation*. 1997;95:1686-744.
- 7 14. Cheitlin MD, Armstrong WF, Aurigemma GP, Beller GA, Bierman FZ, Davis JL,  
8 Douglas PS, Faxon DP, Gillam LD, Kimball TR, Kussmaul WG, Pearlman AS, Philbrick JT,  
9 Rakowski H, Thys DM, Antman EM, Smith SC, Jr., Alpert JS, Gregoratos G, Anderson JL,  
10 Hiratzka LF, Faxon DP, Hunt SA, Fuster V, Jacobs AK, Gibbons RJ and Russell RO.  
11 ACC/AHA/ASE 2003 Guideline Update for the Clinical Application of Echocardiography:  
12 summary article. A report of the American College of Cardiology/American Heart Association  
13 Task Force on Practice Guidelines (ACC/AHA/ASE Committee to Update the 1997 Guidelines  
14 for the Clinical Application of Echocardiography). *J Am Soc Echocardiogr*. 2003;16:1091-110.
- 15 15. Sievers HH and Schmidtke C. A classification system for the bicuspid aortic valve  
16 from 304 surgical specimens. *J Thorac Cardiovasc Surg*. 2007;133:1226-33.
- 17 16. Bonow RO, Carabello BA, Chatterjee K, de Leon AC, Jr., Faxon DP, Freed MD, Gaasch  
18 WH, Lytle BW, Nishimura RA, O'Gara PT, O'Rourke RA, Otto CM, Shah PM, Shanewise JS,  
19 Smith SC, Jr., Jacobs AK, Adams CD, Anderson JL, Antman EM, Fuster V, Halperin JL,  
20 Hiratzka LF, Hunt SA, Lytle BW, Nishimura R, Page RL and Riegel B. ACC/AHA 2006  
21 guidelines for the management of patients with valvular heart disease: a report of the  
22 American College of Cardiology/American Heart Association Task Force on Practice  
23 Guidelines (writing Committee to Revise the 1998 guidelines for the management of patients  
24 with valvular heart disease) developed in collaboration with the Society of Cardiovascular  
25 Anesthesiologists endorsed by the Society for Cardiovascular Angiography and Interventions  
26 and the Society of Thoracic Surgeons. *J Am Coll Cardiol*. 2006;48:e1-148.
- 27 17. Kang JW, Song HG, Yang DH, Baek S, Kim DH, Song JM, Kang DH, Lim TH and Song  
28 JK. Association between bicuspid aortic valve phenotype and patterns of valvular dysfunction  
29 and bicuspid aortopathy: comprehensive evaluation using MDCT and echocardiography.  
30 *JACC Cardiovasc Imaging*. 2013;6:150-61.
- 31 18. Erbel R, Aboyans V, Boileau C, Bossone E, Di Bartolomeo R, Eggebrecht H,  
32 Evangelista A, Falk V, Frank H, Gaemperli O, Grabenwöger M, Haverich A, Iung B, Manolis  
33 AJ, Meijboom F, Nienaber CA, Roffi M, Rousseau H, Sechtem U, Sirnes PA, von Allmen RS  
34 and Vrints CJ. [2014 ESC Guidelines on the diagnosis and treatment of aortic diseases].  
35 *Kardiol Pol*. 2014;72:1169-252.
- 36 19. Hiratzka LF, Creager MA, Isselbacher EM, Svensson LG, Nishimura RA, Bonow RO,  
37 Guyton RA and Sundt TM, 3rd. Surgery for aortic dilatation in patients with bicuspid aortic  
38 valves: A statement of clarification from the American College of Cardiology/American Heart  
39 Association Task Force on Clinical Practice Guidelines. *J Thorac Cardiovasc Surg*.  
40 2016;151:959-66.
- 41 20. Nataf P and Lansac E. Dilation of the thoracic aorta: medical and surgical  
42 management. *Heart*. 2006;92:1345-52.
- 43 21. Fazel SS, Mallidi HR, Lee RS, Sheehan MP, Liang D, Fleischman D, Herfkens R,  
44 Mitchell RS and Miller DC. The aortopathy of bicuspid aortic valve disease has distinctive  
45 patterns and usually involves the transverse aortic arch. *J Thorac Cardiovasc Surg*.  
46 2008;135:901-7, 907 e1-2.
- 47 22. Huntley GD, Thaden JJ, Alsidawi S, Michelena HI, Maleszewski JJ, Edwards WD, Scott  
48 CG, Pislaru SV, Pellikka PA, Greason KL, Ammash NM, Malouf JF, Enriquez-Sarano M and  
49 Nkomo VT. Comparative study of bicuspid vs. tricuspid aortic valve stenosis. *Eur Heart J*  
50 *Cardiovasc Imaging*. 2018;19:3-8.

- 1 23. McKellar SH, Michelena HI, Li Z, Schaff HV and Sundt TM, 3rd. Long-term risk of  
2 aortic events following aortic valve replacement in patients with bicuspid aortic valves. *Am J*  
3 *Cardiol.* 2010;106:1626-33.
- 4 24. Sievers HH, Stierle U, Hachmann RM and Charitos EI. New insights in the association  
5 between bicuspid aortic valve phenotype, aortic configuration and valve haemodynamics.  
6 *Eur J Cardiothorac Surg.* 2016;49:439-46.
- 7 25. Barker AJ, Markl M, Bürk J, Lorenz R, Bock J, Bauer S, Schulz-Menger J and von  
8 Knobelsdorff-Brenkenhoff F. Bicuspid aortic valve is associated with altered wall shear stress  
9 in the ascending aorta. *Circ Cardiovasc Imaging.* 2012;5:457-66.
- 10 26. Verma S and Siu SC. Aortic dilatation in patients with bicuspid aortic valve. *N Engl J*  
11 *Med.* 2014;370:1920-9.
- 12 27. Michelena HI, Della Corte A, Prakash SK, Milewicz DM, Evangelista A and Enriquez-  
13 Sarano M. Bicuspid aortic valve aortopathy in adults: Incidence, etiology, and clinical  
14 significance. *Int J Cardiol.* 2015;201:400-7.
- 15 28. Hope MD, Sigovan M, Wrenn SJ, Saloner D and Dyverfeldt P. MRI hemodynamic  
16 markers of progressive bicuspid aortic valve-related aortic disease. *J Magn Reson Imaging.*  
17 2014;40:140-5.
- 18 29. Pepe G, Nistri S, Giusti B, Sticchi E, Attanasio M, Porciani C, Abbate R, Bonow RO,  
19 Yacoub M and Gensini GF. Identification of fibrillin 1 gene mutations in patients with  
20 bicuspid aortic valve (BAV) without Marfan syndrome. *BMC Med Genet.* 2014;15:23.
- 21 30. Yetman AT, Starr L, Sanmann J, Wilde M, Murray M and Cramer JW. Clinical and  
22 Echocardiographic Prevalence and Detection of Congenital and Acquired Cardiac  
23 Abnormalities in Girls and Women with the Turner Syndrome. *Am J Cardiol.* 2018.
- 24 31. Bondy CA. Care of girls and women with Turner syndrome: a guideline of the Turner  
25 Syndrome Study Group. *J Clin Endocrinol Metab.* 2007;92:10-25.
- 26 32. Carlson M and Silberbach M. Dissection of the aorta in Turner syndrome: two cases  
27 and review of 85 cases in the literature. *BMJ Case Rep.* 2009;2009:bcr0620091998.
- 28 33. Soto-Navarrete MT, López-Unzu M, Durán AC and Fernández B. Embryonic  
29 development of bicuspid aortic valves. *Prog Cardiovasc Dis.* 2020.
- 30 34. Carasso S, Cohen O, Mutlak D, Adler Z, Lessick J, Aronson D, Reisner SA, Rakowski  
31 H, Bolotin G and Agmon Y. Relation of myocardial mechanics in severe aortic stenosis to left  
32 ventricular ejection fraction and response to aortic valve replacement. *Am J Cardiol.*  
33 2011;107:1052-7.
- 34 35. Kong WKF, Regeer MV, Poh KK, Yip JW, van Rosendaal PJ, Yeo TC, Tay E,  
35 Kamperidis V, van der Velde ET, Mertens B, Ajmone Marsan N, Delgado V and Bax JJ. Inter-  
36 ethnic differences in valve morphology, valvular dysfunction, and aortopathy between Asian  
37 and European patients with bicuspid aortic valve. *Eur Heart J.* 2018;39:1308-1313.
- 38 36. Liu F, Yang YN, Xie X, Li XM, Ma X, Fu ZY, Chen BD, Huang Y, Shan CF, Ma YT and  
39 Gao XM. Prevalence of Congenital Heart Disease in Xinjiang Multi-Ethnic Region of China.  
40 *PLoS One.* 2015;10:e0133961.
- 41 37. Li Y, Wei X, Zhao Z, Liao Y, He J, Xiong T, Xu Y, Lv W, Ou Y, Tang H, Feng Y and  
42 Chen M. Prevalence and Complications of Bicuspid Aortic Valve in Chinese According to  
43 Echocardiographic Database. *Am J Cardiol.* 2017;120:287-291.

44

45

1 Figure legends:

2 Figure 1. Study Design.

3 Abbreviations: BAV: bicuspid aortic valve; Type 0: BAV with no raphe; Type 1 L-R: type 1

4 BAV with fusion between the left and right coronary cusp; Type 1 R-N: type 1 BAV with

5 fusion between the right and noncoronary cusp; Type 1 L-N: type 1 BAV with fusion

6 between the left and noncoronary cusp; m-s AS: moderate to severe aortic stenosis; AR  $\geq$  2+:

7 aortic regurgitation  $\geq$  2+; AAo: ascending aorta; LVEF: left ventricular ejection fraction;

8 EAE: early adverse event; ICU: intensive care unit.

9

1 Tables:

2 Table 1. Differences in demography, clinical characteristics, Sievers types, valvulopathy and aortopathy  
3 between male and female BAV patients

| Variables                                        | Total (n = 992)   | Male (n = 734)    | Female (n = 258)  | <i>P</i>                 |
|--------------------------------------------------|-------------------|-------------------|-------------------|--------------------------|
|                                                  |                   |                   |                   | <i>(male vs. female)</i> |
| Age (years)                                      | 50.32 ± 13.48     | 49.38 ± 13.15     | 52.99 ± 14.05     | < 0.001 <sup>#</sup>     |
| Height (cm)                                      | 167.95 ± 8.09     | 170.96 ± 6.54     | 159.39 ± 5.57     | < 0.001 <sup>#</sup>     |
| Weight (kg)                                      | 70.02 ± 12.23     | 72.73 ± 11.68     | 62.33 ± 10.33     | < 0.001 <sup>#</sup>     |
| Body surface area (m <sup>2</sup> )              | 1.77 ± 0.19       | 1.82 ± 0.17       | 1.62 ± 0.15       | < 0.001 <sup>#</sup>     |
| Tobacco use (n, %)                               | 416 (41.9%)       | 406 (55.3%)       | 10 (3.9%)         | < 0.001 <sup>#</sup>     |
| Coronary artery disease (n, %)                   | 90 (9.1%)         | 68 (9.3%)         | 22 (8.5%)         | 0.723                    |
| Diabetes mellitus (n, %)                         | 82 (8.3%)         | 61 (8.3%)         | 21 (8.2%)         | 0.940                    |
| Systolic blood pressure (mmHg)                   | 123.04 ± 17.07    | 123.66 ± 17.10    | 121.26 ± 16.89    | 0.052                    |
| Diastolic blood pressure (mmHg)                  | 72.24 ± 12.82     | 71.93 ± 13.24     | 73.12 ± 11.51     | 0.171                    |
| Hypertension (n, %)                              | 391 (39.4%)       | 302 (41.1%)       | 89 (34.5%)        | 0.060                    |
| <b><i>Serum Lipid Profile</i></b>                |                   |                   |                   |                          |
| Triglyceride (mmol/L)                            | 1.27 (0.88, 1.83) | 1.30 (0.90, 1.92) | 1.18 (0.85, 1.73) | 0.011 <sup>#</sup>       |
| Total cholesterol (mmol/L)                       | 4.42 ± 1.09       | 4.29 ± 1.06       | 4.78 ± 1.08       | < 0.001 <sup>#</sup>     |
| High density lipoprotein (mmol/L)                | 1.11 ± 0.31       | 1.05 ± 0.27       | 1.28 ± 0.33       | < 0.001 <sup>#</sup>     |
| Low density lipoprotein (mmol/L)                 | 2.69 ± 0.83       | 2.61 ± 0.81       | 2.90 ± 0.85       | < 0.001 <sup>#</sup>     |
| <b><i>Cardiac morphology and performance</i></b> |                   |                   |                   |                          |
| LVEDD (mm)                                       | 54.95 ± 11.05     | 57.54 ± 11.90     | 47.67 ± 6.92      | < 0.001 <sup>#</sup>     |
| LVESD (mm)                                       | 36.91 ± 10.37     | 39.05 ± 10.62     | 30.88 ± 6.61      | < 0.001 <sup>#</sup>     |
| BSA - indexed LVEDD (mm/m <sup>2</sup> )         | 31.17 ± 8.29      | 31.16 ± 8.29      | 29.45 ± 5.35      | < 0.001 <sup>#</sup>     |

|                                           |              |               |              |                      |
|-------------------------------------------|--------------|---------------|--------------|----------------------|
| BSA-indexed LVESD (mm/m <sup>2</sup> )    | 21.15 ± 7.05 | 21.15 ± 7.05  | 19.07 ± 4.70 | < 0.001 <sup>#</sup> |
| LVEF (%)                                  | 60.83 ± 9.86 | 59.79 ± 10.05 | 63.74 ± 8.67 | < 0.001 <sup>#</sup> |
| <b><i>Sievers types (n, %)</i></b>        |              |               |              | 0.276                |
| Type 0                                    | 242 (24.4%)  | 170 (23.2%)   | 72 (27.9%)   | NC                   |
| Type 1                                    | 750 (75.6%)  | 564 (76.8%)   | 186 (72.1%)  | NC                   |
| Type 1 L - R                              | 587 (59.2%)  | 447 (60.9%)   | 140 (54.3%)  | NC                   |
| Type 1 R-N                                | 138 (13.9%)  | 98 (13.4%)    | 40 (15.5%)   | NC                   |
| Type 1 L-N                                | 25 (2.5%)    | 19 (2.6%)     | 6 (2.3%)     | NC                   |
| <b><i>Valvulopathy (n, %)</i></b>         | 728 (73.4%)  | 549 (74.8%)   | 179 (69.4%)  | < 0.001 <sup>#</sup> |
| Moderate to severe stenosis (m-s AS) only | 274 (27.6%)  | 156 (21.3%)   | 118 (45.7%)  | < 0.001 <sup>#</sup> |
| Regurgitation (AR) ≥ 2+ only              | 319 (32.2%)  | 286 (39.0%)   | 33 (12.8%)   | < 0.001              |
| m-s AS+AR ≥ 2+                            | 135 (13.6%)  | 107 (14.6%)   | 28 (10.9%)   | 0.133                |
| Normal or mild AS or AR                   | 264 (26.6%)  | 185 (25.2%)   | 79 (30.6%)   | 0.090                |
| <b><i>Aortic Dimensions</i></b>           |              |               |              |                      |
| SOV (mm)                                  | 35.11 ± 6.74 | 36.51 ± 6.75  | 31.16 ± 4.90 | < 0.001 <sup>#</sup> |
| AAo (mm)                                  | 43.93 ± 8.63 | 44.33 ± 8.67  | 42.81 ± 8.44 | 0.016 <sup>#</sup>   |
| BSA - indexed SOV (mm/m <sup>2</sup> )    | 19.93 ± 3.77 | 20.13 ± 3.91  | 19.37 ± 3.28 | 0.003 <sup>#</sup>   |
| BSA - indexed AAo (mm/m <sup>2</sup> )    | 25.04 ± 5.27 | 24.47 ± 5.05  | 26.65 ± 5.52 | < 0.001 <sup>#</sup> |
| <b><i>Aortopathy (n, %)</i></b>           | 724 (73.0%)  | 553 (75.3%)   | 174 (67.4%)  | < 0.001 <sup>#</sup> |
| Root dilation only (n, %)                 | 30 (3%)      | 28 (3.8%)     | 2 (0.8%)     | 0.014 <sup>#</sup>   |
| AAo dilation only (n, %)                  | 497 (50.1%)  | 339 (46.2%)   | 158 (61.2%)  | < 0.001 <sup>#</sup> |
| Diffuse aortic dilation (n, %)            | 197 (19.9%)  | 186 (25.3%)   | 11 (4.3%)    | < 0.001 <sup>#</sup> |
| Normal                                    | 268 (27.0%)  | 181 (24.7%)   | 87 (33.7%)   | 0.005 <sup>#</sup>   |
| Valvulopathy or aortopathy                | 919 (92.6%)  | 688 (93.7%)   | 231 (89.5%)  | 0.004 <sup>#</sup>   |



Valvulopathy and aortopathy 533 (53.7%) 414 (56.4%) 119 (46.1%) 0.026<sup>#</sup>

1 Data present as means ± standard deviation or median (interquartile range) or number (percentage).  
 2 Abbreviations: BAV: bicuspid aortic valve; Type 0: BAV with no raphe; Type 1 L-R: type 1 BAV with fusion between the left and right  
 3 coronary cusp; Type 1 R-N: type 1 BAV with fusion between the right and noncoronary cusp; Type 1 L-N: type 1 BAV with fusion between  
 4 the left and noncoronary cusp; AS: aortic stenosis; AR: aortic regurgitation; BSA: body surface area; LVEDD: left ventricular end-diastolic  
 5 dimension; LVESD: left ventricular end-systolic dimension; LVEF: left ventricular ejection fraction; SOV: sinus of Valsalva; AAo:  
 6 ascending aorta; BSA - indexed SOV: SOV/BSA, BSA - indexed AAo: AAo/BSA. NC: not compared between sexes because there is no sex  
 7 difference when doing Chi-square analysis to analyze the overall effect of sex on Sievers types. <sup>#</sup> *P* < 0.05.

Table 2. Demography and Clinical Characteristics in BAV patients with different Sievers types

| Variables                           | Type 0 (n = 242)  |                   | Type 1 (n = 750)     |                      |                      | <i>P</i><br>(different Sievers types) |
|-------------------------------------|-------------------|-------------------|----------------------|----------------------|----------------------|---------------------------------------|
|                                     |                   |                   | Type 1 L-R (n = 587) | Type 1 R-N (n = 138) | Type 1 L-N (n = 25)  |                                       |
| Age (years)                         | 49.85 ± 13.60     | 50.60 ± 13.52     | 49.75 ± 13.33        | 51.44 ± 12.53        | 0.759                |                                       |
| Male (n, %)                         | 170 (70.2%)       | 447 (76.1%)       | 98 (71.0%)           | 19 (76.0%)           | 0.276                |                                       |
| Height (cm)                         | 167.29 ± 8.46     | 168.38 ± 7.62     | 167.04 ± 9.38        | 168.92 ± 7.15        | 0.503                |                                       |
| Weight (kg)                         | 69.75 ± 12.86     | 70.25 ± 11.79     | 69.71 ± 12.60        | 68.92 ± 14.59        | 0.912                |                                       |
| Body surface area (m <sup>2</sup> ) | 1.76 ± 0.20       | 1.77 ± 0.18       | 1.76 ± 0.20          | 1.76 ± 0.22          | 0.862                |                                       |
| Tobacco use (n, %)                  | 103 (42.6%)       | 248 (42.2%)       | 52 (37.7%)           | 13 (52.0%)           | 0.546                |                                       |
| Coronary artery disease (n, %)      | 28 (11.6%)        | 47 (8.0%)         | 13 (9.4%)            | 2 (8.0%)             | 0.551                |                                       |
| Diabetes mellitus (n, %)            | 23 (9.5%)         | 45 (7.7%)         | 13 (9.4%)            | 1 (4.0%)             | 0.654                |                                       |
| Systolic blood pressure (mmHg)      | 122.50 ± 17.62    | 123.94 ± 16.70    | 122.41 ± 17.78       | 110.60 ± 10.87       | < 0.001 <sup>#</sup> |                                       |
| Diastolic blood pressure (mmHg)     | 75.15 ± 12.78     | 71.33 ± 12.84     | 71.54 ± 12.45        | 69.40 ± 10.65        | 0.001 <sup>#</sup>   |                                       |
| Hypertension (n, %)                 | 95 (39.3%)        | 241 (41.1%)       | 47 (34.1%)           | 8 (32.0%)            | 0.408                |                                       |
| <b>Serum Lipid Profile</b>          |                   |                   |                      |                      |                      |                                       |
| Triglyceride (mmol/L)               | 1.22 (0.86, 1.77) | 1.27 (0.88, 1.88) | 1.30 (1.00, 1.76)    | 1.32 (0.80, 2.30)    | 0.682                |                                       |

|                                                  |               |               |               |              |                      |
|--------------------------------------------------|---------------|---------------|---------------|--------------|----------------------|
| Total cholesterol (mmol/L)                       | 4.40 ± 1.02   | 4.43 ± 1.12   | 4.44 ± 1.08   | 4.20 ± 0.85  | 0.679                |
| High density lipoprotein (mmol/L)                | 1.11 ± 0.32   | 1.11 ± 0.30   | 1.10 ± 0.34   | 1.03 ± 0.29  | 0.458                |
| Low density lipoprotein (mmol/L)                 | 2.67 ± 0.79   | 2.71 ± 0.84   | 2.67 ± 0.88   | 2.53 ± 0.72  | 0.770                |
| <b><i>Cardiac morphology and performance</i></b> |               |               |               |              |                      |
| LVEDD (mm)                                       | 53.17 ± 10.74 | 55.79 ± 11.39 | 55.08 ± 10.06 | 52.20 ± 9.16 | 0.004 <sup>#</sup>   |
| LVESD (mm)                                       | 35.81 ± 10.38 | 37.58 ± 10.74 | 36.45 ± 8.89  | 34.82 ± 8.17 | 0.050                |
| BSA - indexed LVEDD (mm/m <sup>2</sup> )         | 30.19 ± 7.22  | 30.81 ± 8.16  | 31.37 ± 6.49  | 29.86 ± 5.27 | 0.006 <sup>#</sup>   |
| BSA-indexed LVESD (mm/m <sup>2</sup> )           | 20.35 ± 6.61  | 20.73 ± 6.91  | 20.66 ± 5.67  | 19.92 ± 4.84 | 0.109                |
| LVEF (%)                                         | 60.90 ± 10.58 | 60.55 ± 10.00 | 61.91 ± 8.29  | 60.68 ± 6.97 | 0.621                |
| <b><i>Valvulopathy (n, %)</i></b>                |               |               |               |              | < 0.001 <sup>#</sup> |
| Moderate to severe stenosis (m-s AS) only        | 70 (28.9%)    | 166 (28.3%)   | 32 (23.2%)    | 6 (24.0%)    | 0.603                |
| Regurgitation (AR) ≥ 2+ only                     | 47 (19.4%)    | 219 (37.3%)   | 48 (34.8%)    | 5 (20.0%)    | < 0.001 <sup>#</sup> |
| m-s AS+AR ≥ 2+                                   | 24 (9.9%)     | 81 (13.8%)    | 26 (18.8%)    | 4 (16.0%)    | 0.104                |
| Normal or mild AS or AR                          | 101 (41.7%)   | 121 (20.6%)   | 32 (23.2%)    | 10 (40.0%)   | < 0.001 <sup>#</sup> |
| <b><i>Aortic Dimensions</i></b>                  |               |               |               |              |                      |
| SOV (mm)                                         | 33.39 ± 6.46  | 36.11 ± 6.86  | 33.84 ± 6.06  | 35.51 ± 6.05 | < 0.001 <sup>#</sup> |
| AAo (mm)                                         | 44.30 ± 8.88  | 43.72 ± 8.77  | 44.10 ± 7.63  | 44.39 ± 8.64 | 0.221                |
| BSA - indexed SOV (mm/m <sup>2</sup> )           | 18.97 ± 3.81  | 20.46 ± 3.74  | 19.30 ± 3.29  | 20.42 ± 4.17 | < 0.001 <sup>#</sup> |
| BSA - indexed AAO (mm/m <sup>2</sup> )           | 25.26 ± 5.53  | 24.85 ± 5.31  | 25.35 ± 4.60  | 25.45 ± 5.24 | 0.119                |
| <b><i>Aortopathy (n, %)</i></b>                  |               |               |               |              | 0.001 <sup>#</sup>   |
| Root dilation only (n, %)                        | 3 (1.2%)      | 24 (4.1%)     | 2 (1.4%)      | 1 (4.0%)     | 0.105                |
| AAo dilation only (n, %)                         | 139 (57.4%)   | 262 (44.6%)   | 84 (60.9%)    | 12 (48.0%)   | < 0.001 <sup>#</sup> |
| Diffuse aortic dilation (n, %)                   | 33 (13.6%)    | 139 (23.7%)   | 20 (14.5%)    | 5 (20%)      | 0.003 <sup>#</sup>   |

|                             |             |             |             |            |                      |
|-----------------------------|-------------|-------------|-------------|------------|----------------------|
| Normal                      | 67 (27.7%)  | 162 (27.6%) | 32 (28.0%)  | 7 (28.0%)  | 0.755                |
| Valvulopathy or aortopathy  | 209 (86.4%) | 554 (94.4%) | 113 (96.4%) | 23 (92.0%) | < 0.001 <sup>#</sup> |
| Valvulopathy and aortopathy | 107 (44.2)  | 337 (57.4%) | 79 (57.2%)  | 10 (40.0%) | 0.002 <sup>#</sup>   |

---

Data present as means  $\pm$  standard deviation or median (interquartile range) or number (percentage).

Abbreviations: BAV: bicuspid aortic valve; Type 0: BAV with no raphe; Type 1 L-R: type 1 BAV with fusion between the left and right coronary cusp; Type 1 R-N: type 1 BAV with fusion between the right and noncoronary cusp; Type 1 L-N: type 1 BAV with fusion between the left and noncoronary cusp; AS: aortic stenosis; AR: aortic regurgitation; BSA: body surface area; LVEDD: left ventricular end-diastolic dimension; LVESD: left ventricular end-systolic dimension; LVEF: left ventricular ejection fraction; SOV: sinus of Valsalva; AAo: ascending aorta; BSA - indexed SOV: SOV / BSA, BSA - indexed AAo: AAo / BSA. <sup>#</sup>*P* < 0.05.

Table 3. Risk factors for BAV Valvulopathy

| Variable                | Total                                                 |                                          |                                        |  |                                                       |                                          | Male                                   |  |                                                       |                                          |                                        |  | Female |  |  |  |  |  |
|-------------------------|-------------------------------------------------------|------------------------------------------|----------------------------------------|--|-------------------------------------------------------|------------------------------------------|----------------------------------------|--|-------------------------------------------------------|------------------------------------------|----------------------------------------|--|--------|--|--|--|--|--|
|                         | Moderate to severe stenosis (m-s AS) only (OR, CI, P) | Regurgitation (AR) ≥ 2+ only (OR, CI, P) | m-s AS+AR ≥ 2+ (OR, CI, P)             |  | Moderate to severe stenosis (m-s AS) only (OR, CI, P) | Regurgitation (AR) ≥ 2+ only (OR, CI, P) | m-s AS+AR ≥ 2+ (OR, CI, P)             |  | Moderate to severe stenosis (m-s AS) only (OR, CI, P) | Regurgitation (AR) ≥ 2+ only (OR, CI, P) | m-s AS+AR ≥ 2+ (OR, CI, P)             |  |        |  |  |  |  |  |
| Age                     | 1.038, 1.022–1.055, 0.000 <sup>#</sup>                | 0.987, 0.972–1.001, 0.074                | 1.013, 0.994–1.032, 0.181              |  | 1.046, 1.025–1.068, 0.000 <sup>#</sup>                | 0.991, 0.974–1.008, 0.282                | 1.005, 0.984–1.027, 0.633              |  | 1.033, 1.007–1.059, 0.011 <sup>#</sup>                | 0.971, 0.940–1.003, 0.073                | 1.045, 1.004–1.088, 0.033 <sup>#</sup> |  |        |  |  |  |  |  |
| Body surface area       | 0.148, 0.044–0.493, 0.002 <sup>#</sup>                | 0.491, 0.157–1.531, 0.220                | 0.044, 0.011–0.185, 0.000 <sup>#</sup> |  | 0.085, 0.019–0.378, 0.001 <sup>#</sup>                | 0.549, 0.161–1.874, 0.339                | 0.049, 0.010–0.239, 0.000 <sup>#</sup> |  | 0.352, 0.042–2.931, 0.334                             | 0.203, 0.010–3.992, 0.294                | 0.036, 0.001–0.926, 0.045 <sup>#</sup> |  |        |  |  |  |  |  |
| Systolic blood pressure | 1.002, 0.991–1.014, 0.690                             | 1.017, 1.006–1.028, 0.003 <sup>#</sup>   | 1.000, 0.986–1.013, 0.956              |  | 1.006, 0.992–1.020, 0.397                             | 1.018, 1.006–1.031, 0.004 <sup>#</sup>   | 0.996, 0.980–1.012, 0.599              |  | 0.996, 0.976–1.016, 0.684                             | 1.008, 0.980–1.037, 0.586                | 1.006, 0.978–1.035, 0.670              |  |        |  |  |  |  |  |
| Triglyceride            | 0.931, 0.786–1.102, 0.407                             | 0.953, 0.810–1.121, 0.562                | 0.978, 0.802–1.193, 0.829              |  | 0.954, 0.770–1.181, 0.663                             | 0.967, 0.812–1.150, 0.702                | 0.970, 0.768–1.223, 0.794              |  | 0.902, 0.680–1.196, 0.473                             | 0.840, 0.492–1.435, 0.524                | 0.947, 0.621–1.444, 0.801              |  |        |  |  |  |  |  |
| Total cholesterol       | 1.060, 0.880–1.277, 0.540                             | 0.916, 0.760–1.104, 0.358                | 1.174, 0.943–1.461, 0.152              |  | 1.077, 0.844–1.374, 0.551                             | 0.967, 0.783–1.194, 0.757                | 1.201, 0.929–1.553, 0.162              |  | 1.022, 0.757–1.380, 0.885                             | 0.742, 0.484–1.137, 0.171                | 1.015, 0.647–1.593, 0.947              |  |        |  |  |  |  |  |
| Male                    | 1.130, 0.671–1.903, 0.645                             | 4.358, 2.452–7.745, 0.000 <sup>#</sup>   | 2.757, 1.430–5.316, 0.002 <sup>#</sup> |  | N/A                                                   | N/A                                      | N/A                                    |  | N/A                                                   | N/A                                      | N/A                                    |  |        |  |  |  |  |  |

|                         |                           |               |                           |                           |               |                           |   |   |   |
|-------------------------|---------------------------|---------------|---------------------------|---------------------------|---------------|---------------------------|---|---|---|
| <b>Sievers types</b>    |                           |               |                           |                           |               |                           | * | * | * |
| Sievers types 0         | 1.039, 0.340–             | 0.714, 0.217– | 0.680, 0.186–             | 1.238, 0.315–             | 0.846, 0.222– | 0.510, 0.125–             |   |   |   |
|                         | 3.177, 0.947              | 2.352, 0.580  | 2.491, 0.561              | 4.871, 0.760              | 3.225, 0.807  | 2.071, 0.346              |   |   |   |
| Sievers type 1 L - R    | 2.261, 0.756–             | 2.943, 0.932– | 1.920, 0.550–             | 2.183, 0.571–             | 2.878, 0.787– | 1.422, 0.375–             |   |   |   |
|                         | 6.763, 0.144              | 9.293, 0.066  | 6.696, 0.306              | 8.347, 0.254              | 10.523, 0.110 | 5.397, 0.605              |   |   |   |
| Sievers type 1 R-N      | 1.343, 0.409–             | 2.633, 0.772– | 2.243, 0.593–             | 0.882, 0.198–             | 2.334, 0.587– | 1.588, 0.377–             |   |   |   |
|                         | 4.405, 0.627              | 8.974, 0.122  | 8.483, 0.234              | 3.937, 0.869              | 9.277, 0.228  | 6.690, 0.528              |   |   |   |
| <b>Aortopathy</b>       |                           |               |                           |                           |               |                           | * | * | * |
| Root dilation only      | 0.843, 0.212–             | 2.204, 0.757– | *                         | 0.821, 0.176–             | 2.088, 0.705– | *                         |   |   |   |
| (n, %)                  | 3.361, 0.809              | 6.414, 0.147  |                           | 3.825, 0.802              | 6.183, 0.184  |                           |   |   |   |
| AAo dilation only       | 1.274, 0.822–             | 0.834, 0.528– | 2.126, 1.170–             | 1.614, 0.906–             | 0.897, 0.533– | 2.164, 1.061–             |   |   |   |
| (n, %)                  | 1.973, 0.278              | 1.320, 0.439  | 3.864, 0.013 <sup>#</sup> | 2.875, 0.104              | 1.508, 0.681  | 4.414, 0.034 <sup>#</sup> |   |   |   |
| Diffuse aortic dilation | 0.252, 0.121–             | 1.415, 0.827– | 2.478, 1.214–             | 0.350, 0.156–             | 1.480, 0.833– | 2.837, 1.288–             |   |   |   |
| (n, %)                  | 0.525, 0.000 <sup>#</sup> | 2.422, 0.205  | 5.059, 0.013 <sup>#</sup> | 0.784, 0.011 <sup>#</sup> | 2.631, 0.181  | 6.251, 0.010 <sup>#</sup> |   |   |   |

Abbreviations: Type 0: BAV with no raphe; Type 1 L-R: type 1 BAV with fusion between the left and right coronary cusp; Type 1 R-N: type 1 BAV with fusion between the right and noncoronary cusp; BAV:

bicuspid aortic valve; AS: aortic stenosis; AR: aortic regurgitation; AAo: ascending aorta. \* Limited number of patients for data analysis. <sup>#</sup>  $P < 0.05$ . In analysis for male and female, sex has not been included as an independent factor.

Table 4. Risk factors for BAV aortopathy

| Variable                | Total                                         |                                             |                                               | Male                                          |                                             |                                                | Female                                    |                                        |
|-------------------------|-----------------------------------------------|---------------------------------------------|-----------------------------------------------|-----------------------------------------------|---------------------------------------------|------------------------------------------------|-------------------------------------------|----------------------------------------|
|                         | Root dilation only<br>(OR, CI, P)             | AAo dilation only<br>(OR, CI, P)            | Diffuse aortic<br>dilation (OR, CI, P)        | Root dilation only<br>(OR, CI, P)             | AAo dilation only<br>(OR, CI, P)            | Diffuse aortic<br>dilation (OR, CI, P)         | AAo dilation only<br>(OR, CI, P)          | Diffuse aortic<br>dilation (OR, CI, P) |
| Age                     | 0.991, 0.956–1.026,<br>0.601                  | 1.037, 1.023–1.050,<br>0.000 <sup>#</sup>   | 1.050, 1.032–1.069,<br>0.000 <sup>#</sup>     | 0.991, 0.955–1.029,<br>0.651                  | 1.033, 1.017–1.049,<br>0.000 <sup>#</sup>   | 1.049, 1.029–1.069,<br>0.000 <sup>#</sup>      | 1.047, 1.021–1.073,<br>0.000 <sup>#</sup> | 1.052, 0.991–1.118,<br>0.098           |
| Body surface area       | 21.551, 1.608–<br>288.773, 0.020 <sup>#</sup> | 5.751, 2.037–<br>16.237, 0.001 <sup>#</sup> | 37.554, 9.783–<br>144.163, 0.000 <sup>#</sup> | 18.416, 1.214–<br>279.353, 0.036 <sup>#</sup> | 7.243, 2.134–<br>24.588, 0.001 <sup>#</sup> | 45.402, 10.638–<br>193.951, 0.000 <sup>#</sup> | 4.124, 0.523–<br>32.501, 0.179            | 33.767, 0.191–<br>5971.859, 0.183      |
| Systolic blood pressure | 0.989, 0.965–1.015,<br>0.413                  | 0.991, 0.982–1.001,<br>0.076                | 0.997, 0.985–1.010,<br>0.658                  | 0.984, 0.957–1.011,<br>0.241                  | 0.989, 0.977–1.000,<br>0.056                | 0.996, 0.983–1.009,<br>0.554                   | 0.997, 0.978–1.016,<br>0.730              | 1.013, 0.963–1.066,<br>0.626           |
| No tobacco              | 0.541, 0.213–1.375,<br>0.197                  | 0.971, 0.657–1.434,<br>0.881                | 1.019, 0.645–1.610,<br>0.936                  | 0.539, 0.209–1.391,<br>0.201                  | 0.954, 0.636–1.429,<br>0.818                | 1.042, 0.655–1.656,<br>0.863                   | 1.011, 0.171–5.966,<br>0.990              | 0.085, 0.002–3.464,<br>0.193           |
| Triglyceride            | 1.177, 0.914–1.516,<br>0.206                  | 0.910, 0.789–1.049,<br>0.195                | 0.881, 0.730–1.064,<br>0.188                  | 1.198, 0.916–1.568,<br>0.186                  | 0.914, 0.768–1.098,<br>0.315                | 0.909, 0.745–1.108,<br>0.345                   | 0.895, 0.687–1.166,<br>0.412              | 0.157, 0.022–1.105,<br>0.063           |
| Total cholesterol       | 0.843, 0.572–1.244,<br>0.390                  | 1.009, 0.862–1.181,<br>0.914                | 1.006, 0.813–1.245,<br>0.955                  | 0.819, 0.538–1.248,<br>0.353                  | 1.056, 0.868–1.285,<br>0.586                | 1.042, 0.826–1.315,<br>0.728                   | 0.889, 0.669–1.180,<br>0.414              | 1.055, 0.414–2.688,<br>0.911           |
| <i>Sievers types</i>    |                                               |                                             |                                               |                                               |                                             |                                                |                                           |                                        |

|                                              |                                |                              |                                           |                                |                                           |                                           |                                                     |                                |
|----------------------------------------------|--------------------------------|------------------------------|-------------------------------------------|--------------------------------|-------------------------------------------|-------------------------------------------|-----------------------------------------------------|--------------------------------|
| Sievers types 0                              | 0.443, 0.037–5.326,<br>0.521   | 1.492, 0.537–4.143,<br>0.442 | 0.833, 0.220–3.160,<br>0.788              | 0.494, 0.039–6.204,<br>0.585   | 1.715, 0.513–5.740,<br>0.381              | 1.170, 0.263–5.208,<br>0.837              | 0.918, 0.114–7.379,<br>0.936                        | 0.252, 0.007–8.865,<br>0.448   |
| Sievers type 1 L - R                         | 1.065, 0.112–<br>10.145, 0.956 | 1.069, 0.395–2.890,<br>0.896 | 1.261, 0.351–4.536,<br>0.722              | 1.020, 0.102–<br>10.181, 0.986 | 1.096, 0.340–3.528,<br>0.878              | 1.616, 0.386–6.776,<br>0.511              | 0.798, 0.103–6.188,<br>0.829                        | 0.633, 0.024–<br>16.905, 0.785 |
| Sievers type 1 R-N                           | 0.246, 0.013–4.837,<br>0.356   | 1.885, 0.650–5.462,<br>0.243 | 0.849, 0.211–3.422,<br>0.819              | 0.280, 0.014–5.766,<br>0.409   | 2.200, 0.620–7.813,<br>0.223              | 1.198, 0.252–5.697,<br>0.821              | 1.221, 0.142–<br>10.492, 0.855                      | 0.388, 0.009–<br>16.273, 0.619 |
| <b>Valvulopathy</b>                          |                                |                              |                                           |                                |                                           |                                           |                                                     |                                |
| Moderate to severe<br>stenosis (m-s AS) only | 0.905, 0.227–3.615,<br>0.888   | 1.303, 0.843–2.014,<br>0.234 | 0.242, 0.116–0.509,<br>0.000 <sup>#</sup> | 0.818, 0.178–3.757,<br>0.796   | 1.574, 0.885–2.796,<br>0.122              | 0.338, 0.151–0.759,<br>0.009 <sup>#</sup> | 1.062, 0.521–2.163,<br>0.868                        | *<br>*                         |
| Regurgitation (AR) ≥ 2+<br>only              | 2.431, 0.820–7.210,<br>0.109   | 0.852, 0.540–1.342,<br>0.489 | 1.437, 0.840–2.457,<br>0.186              | 2.275, 0.748–6.917,<br>0.147   | 0.886, 0.528–1.486,<br>0.646              | 1.505, 0.846–2.679,<br>0.165              | 0.878, 0.303–2.543,<br>0.811                        | 0.924, 0.154–5.553,<br>0.931   |
| m-s AS+AR ≥ 2+                               | *<br>0.198                     | 2.030, 1.122–3.675,<br>0.019 | 2.402, 1.182–4.881,<br>0.015 <sup>#</sup> | *<br>0.051                     | 2.015, 0.997–4.072,<br>0.013 <sup>#</sup> | 2.694, 1.231–5.895,<br>0.198              | 2.142, 0.672–6.828,<br>0.343, 0.015–7.799,<br>0.502 |                                |
| Male                                         | 1.815, 0.345–9.553,<br>0.482   | 1.067, 0.681–1.672,<br>0.778 | 3.868, 1.784–8.385,<br>0.001 <sup>#</sup> | N/A                            | N/A                                       | N/A                                       | N/A                                                 | N/A                            |

Abbreviations: Type 0: BAV with no raphe; Type 1 L-R: type 1 BAV with fusion between the left and right coronary cusp; Type 1 R-N: type 1 BAV with fusion between the right and noncoronary cusp; BAV: bicuspid aortic valve; AS: aortic stenosis; AR: aortic regurgitation. AAO: ascending aorta. \* Limited number of patients for data analysis. And there are too fewer female patients with root dilation only to do any analysis. <sup>#</sup>  $P < 0.05$ . In analysis for male and female, sex has not been included as an independent factor.

Table 5. Summary of pre-, intra- and postoperative characteristics and outcomes of BAV patients underwent AVR

| Variables                                 | Total (n = 658) | Male (n = 494) | Female (n = 164) | P                    |
|-------------------------------------------|-----------------|----------------|------------------|----------------------|
| <b>Preoperative</b>                       |                 |                |                  |                      |
| Age (years)                               | 50.09 ± 12.94   | 48.74 ± 12.73  | 55.34 ± 11.20    | < 0.001 <sup>#</sup> |
| Systolic blood pressure (mmHg)            | 123.92 ± 17.11  | 124.39 ± 16.53 | 122.12 ± 17.79   | 0.134                |
| Diastolic blood pressure (mmHg)           | 71.41 ± 12.81   | 70.94 ± 13.35  | 73.30 ± 11.07    | 0.026 <sup>#</sup>   |
| Body surface area (m <sup>2</sup> )       | 1.77 ± 0.18     | 1.82 ± 0.16    | 1.62 ± 0.15      | < 0.001 <sup>#</sup> |
| LVEDD (mm)                                | 55.87 ± 10.79   | 58.42 ± 10.66  | 48.32 ± 7.00     | < 0.001 <sup>#</sup> |
| LVESD (mm)                                | 37.23 ± 9.44    | 39.18 ± 9.55   | 31.47 ± 6.22     | < 0.001 <sup>#</sup> |
| LVEF (%)                                  | 61.41 ± 8.54    | 60.67 ± 8.57   | 63.67 ± 8.18     | < 0.001 <sup>#</sup> |
| <i>Valvulopathy (n, %)</i>                |                 |                |                  | < 0.001 <sup>#</sup> |
| Moderate to severe stenosis (m-s AS) only | 220 (33.4%)     | 119 (24.1%)    | 101 (61.6%)      | < 0.001 <sup>#</sup> |
| Regurgitation (AR) ≥ 2+ only              | 248 (37.7%)     | 223 (45.1%)    | 25 (15.2%)       | < 0.001 <sup>#</sup> |
| m-s AS+AR ≥ 2+                            | 105 (16.0%)     | 85 (17.2%)     | 20 (12.2%)       | 0.141                |
| <i>Sievers types (n, %)</i>               |                 |                |                  | 0.396                |
| Type 0                                    | 134 (20.4%)     | 97 (19.6%)     | 37 (22.6%)       |                      |
| Type 1 L-R                                | 408 (62.0%)     | 315 (63.8%)    | 93 (56.7%)       |                      |
| Type 1 R-N                                | 98 (14.9%)      | 69 (14.0%)     | 29 (17.7%)       |                      |
| Type 1 L-N                                | 18 (2.7%)       | 13 (2.6%)      | 5 (3.0%)         |                      |
| <i>BAV Aortopathy (n, %)</i>              |                 |                |                  | < 0.001 <sup>#</sup> |
| Root dilation only                        | 20 (3.0%)       | 19 (3.8%)      | 1 (0.6%)         | 0.036 <sup>#</sup>   |
| AAo dilation only                         | 332 (50.5%)     | 226 (45.7%)    | 106 (64.6%)      | < 0.001 <sup>#</sup> |
| Diffuse aortic dilation                   | 154 (23.4%)     | 147 (29.8%)    | 7 (4.3%)         | < 0.001 <sup>#</sup> |
| Normal                                    | 152 (23.1%)     | 102 (20.6%)    | 50 (30.5%)       |                      |



*Drug use*

|                               |             |             |            |       |
|-------------------------------|-------------|-------------|------------|-------|
| ACEI/ARB (n, %)               | 104 (15.8%) | 83 (16.8%)  | 21 (12.8%) | 0.224 |
| Myocardial nourishment (n, %) | 166 (25.2%) | 127 (25.7%) | 39 (23.8%) | 0.622 |
| $\beta$ -blocker (n, %)       | 107 (16.3%) | 77 (15.6%)  | 30 (18.3%) | 0.416 |

***Intraoperative***

|                                       |                  |                     |                     |                      |
|---------------------------------------|------------------|---------------------|---------------------|----------------------|
| Operation hours (hour)                | 4 (4, 5)         | 4 (4, 5)            | 4.5 (4, 5)          | 0.622                |
| Blood loss (ml)                       | 800 (600, 1100)  | 800 (600, 1200)     | 800 (600, 1000)     | 0.674                |
| Intraoperative blood products (ml)    | 600 (300, 900)   | 567 (300, 900)      | 600 (300, 1000)     | 0.051                |
| Cardiopulmonary bypass time (minutes) | 117 (93, 152.25) | 117 (93.75, 146.25) | 117 (92.25, 158.75) | 0.995                |
| Aortic cross clamp time (minutes)     | 79 (61.75, 103)  | 79 (61, 103.25)     | 77 (62, 102)        | 0.769                |
| Aortic valve implant size (mm)        | 22.70 $\pm$ 2.06 | 23.29 $\pm$ 1.73    | 20.99 $\pm$ 2.05    | < 0.001 <sup>#</sup> |
| Ascending aortic replacement (%)      | 310 (47.1%)      | 248 (50.2%)         | 62 (37.8%)          | 0.006 <sup>#</sup>   |
| CABG (%)                              | 52 (7.9%)        | 42 (8.7%)           | 10 (6.1%)           | 0.323                |

***Postoperative***

|                                   |                   |                   |                   |                      |
|-----------------------------------|-------------------|-------------------|-------------------|----------------------|
| Total ICU hours (hours)           | 21 (18, 26)       | 21 (18, 26)       | 21 (19, 29.74)    | 0.042 <sup>#</sup>   |
| Total ICU hours > 24 hours (n, %) | 210 (31.9%)       | 147 (29.8)        | 63 (38.4)         | 0.039 <sup>#</sup>   |
| Postoperative LVEDD (mm)          | 48.57 $\pm$ 7.63  | 50.14 $\pm$ 7.79  | 43.77 $\pm$ 4.60  | < 0.001 <sup>#</sup> |
| Postoperative LVESD (mm)          | 33.25 $\pm$ 7.89  | 34.72 $\pm$ 8.14  | 28.77 $\pm$ 4.96  | < 0.001 <sup>#</sup> |
| Postoperative LVEF (%)            | 58.04 $\pm$ 10.26 | 57.03 $\pm$ 10.11 | 60.83 $\pm$ 10.66 | < 0.001 <sup>#</sup> |

***Postoperative LVEF change***

|                                   |             |              |            |                      |
|-----------------------------------|-------------|--------------|------------|----------------------|
| Postoperative LVEF change (%)     | -2 (-9, 3)  | -2.5 (-9, 2) | -1 (-8, 3) | 0.215                |
| Postoperative LVEF < 50% (n, %)   | 86 (13.1%)  | 80 (16.2%)   | 6 (3.7%)   | < 0.001 <sup>#</sup> |
| Postoperative LVEF increase > 5%  | 114 (17.3%) | 79 (16%)     | 35 (21.3%) | 0.117                |
| Postoperative LVEF increase > 10% | 41 (6.2%)   | 25 (5.1%)    | 16 (9.8%)  | 0.031 <sup>#</sup>   |

|                                              |             |             |             |                    |
|----------------------------------------------|-------------|-------------|-------------|--------------------|
| Postoperative LVEF decrease > 5%             | 273 (41.5%) | 205 (41.5%) | 68 (41.5%)  | 0.994              |
| Postoperative LVEF decrease > 10%            | 139 (21.1%) | 109 (22.1%) | 30 (18.3%)  | 0.305              |
| Total length of stay (days)                  | 15 (12, 20) | 15 (12, 19) | 15 (12, 21) | 0.273              |
| Postoperative length of stay (days)          | 7 (6, 10)   | 7 (6, 10)   | 8 (7, 11)   | 0.044 <sup>#</sup> |
| Postoperative length of stay > 7 days (n, %) | 324 (49.2)  | 231 (46.8)  | 93 (56.7)   | 0.027 <sup>#</sup> |
| <b>EAE (n, %)</b>                            |             |             |             |                    |
| Myocardial infarction                        | 5 (0.8%)    | 5 (1.0%)    | 0 (0%)      | 0.339              |
| Ventricular fibrillation                     | 30 (4.6%)   | 21 (4.3%)   | 9 (5.5%)    | 0.519              |
| Acute heart failure                          | 14 (2.1%)   | 10 (2.0%)   | 4 (2.4%)    | 0.757              |
| Postoperative death                          | 12 (1.8%)   | 9 (1.8%)    | 3 (1.8%)    | 1.000              |
| Use of ECMO or IABP                          | 15 (2.3%)   | 12 (2.4%)   | 3 (1.8%)    | 1.000              |
| Renal failure                                | 5 (0.8%)    | 5 (1.0%)    | 0 (0%)      | 0.339              |
| Stroke                                       | 12 (1.8%)   | 9 (1.8%)    | 3 (1.8%)    | 1.000              |
| Reoperation for bleeding                     | 39 (5.9%)   | 26 (5.3%)   | 13 (7.9%)   | 0.211              |

---

Data present as means ± standard deviation or median (interquartile range) or number (percentage).

Abbreviations: AS: aortic stenosis; AR: aortic regurgitation; AAo: ascending aorta; BAV: bicuspid aortic valve; Type 0: BAV with no raphe; Type 1 L-R: type 1 BAV with fusion between the left and right coronary cusp; Type 1 R-N: type 1 BAV with fusion between the right and noncoronary cusp; Type 1 L-N: type 1 BAV with fusion between the left and noncoronary cusp; CABG: coronary artery bypass grafting; ICU: intensive care unit; LVEDD: left ventricular end-diastolic dimension; LVESD: left ventricular end-systolic dimension; LVEF: left ventricular ejection fraction; EAE: early adverse event; ECMO: extracorporeal membrane oxygenation; IABP: intra-aortic balloon pump. <sup>#</sup>  $P < 0.05$ .

Table 6. Factors related to post-OP EAE, postoperative LVEF < 50%, total ICU hours > 24 hours and Postoperative length of stay > 7 days

| Variables                                    | Cox regression: EAE     |                      | Logistic regression: postoperative<br>LVEF<50% |                      | Total ICU hours > 24 hours |                      | Postoperative length of stay > 7 days |                      |
|----------------------------------------------|-------------------------|----------------------|------------------------------------------------|----------------------|----------------------------|----------------------|---------------------------------------|----------------------|
|                                              | Univariable             | Multivariable        | Univariable                                    | Multivariable        | Univariable                | Multivariable        | Univariable                           | Multivariable        |
|                                              | analysis (HR, CI,<br>P) | analysis (HR, CI, P) | analysis (OR, CI,<br>P)                        | analysis (OR, CI, P) | analysis (OR, CI,<br>P)    | analysis (OR, CI, P) | analysis (OR, CI,<br>P)               | analysis (OR, CI, P) |
| Male                                         | 1.542, 0.875–           | 1.213, 0.742–1.982,  | 3.358, 1.135–                                  | 3.071, 1.096–8.606,  | 0.650, 0.406–              | 0.710, 0.479–1.053,  | 0.754, 0.485–                         | 0.791, 0.533–        |
|                                              | 2.717, 0.134            | 0.441                | 9.936, 0.029                                   | 0.033 <sup>#</sup>   | 1.043, 0.074               | 0.089                | 1.173, 0.210                          | 1.173, 0.243         |
| Age                                          | 1.028, 1.007–           | 1.030, 1.011–1.050,  | 1.006, 0.981–                                  |                      | 1.019, 1.004–              | 1.018, 1.003–1.033,  | 1.003, 0.989–                         |                      |
|                                              | 1.049, 0.008            | 0.002 <sup>#</sup>   | 1.031, 0.648                                   |                      | 1.036, 0.017               | 0.015 <sup>#</sup>   | 1.017, 0.645                          |                      |
| Body surface area                            | 0.439, 0.107–           |                      | 0.740, 0.132–                                  |                      | 2.119, 0.681–              |                      | 1.355, 0.484–                         |                      |
|                                              | 1.799, 0.253            |                      | 4.160, 0.740                                   |                      | 6.597, 0.195               |                      | 3.789, 0.563                          |                      |
| Systolic blood pressure                      | 0.995, 0.983–           |                      | 0.977, 0.955–                                  | 0.976, 0.955–0.999,  | 1.000, 0.989–              |                      | 0.990, 0.980–                         | 0.990, 0.981–1.000,  |
|                                              | 1.009, 0.500            |                      | 1.000, 0.046                                   | 0.037 <sup>#</sup>   | 1.010, -0.930              |                      | 1.000, 0.404                          | 0.047 <sup>#</sup>   |
| <b>Valvulopathy</b>                          |                         |                      |                                                |                      |                            |                      |                                       |                      |
| Moderate to severe<br>stenosis (m-s AS) only | 0.784, 0.405–           |                      | 0.785, 0.204–                                  | 0.805, 0.213–3.052,  | 0.904, 0.498–              |                      | 1.837, 1.052–                         | 1.846, 1.074–3.172,  |
|                                              | 1.518, 0.471            |                      | 3.014, 0.724                                   | 0.750                | 1.639, 0.739               |                      | 3.207, 0.032                          | 0.027 <sup>#</sup>   |

|                              |                               |                                           |                               |                                           |                               |                                           |                               |                                           |
|------------------------------|-------------------------------|-------------------------------------------|-------------------------------|-------------------------------------------|-------------------------------|-------------------------------------------|-------------------------------|-------------------------------------------|
| Regurgitation (AR) ≥ 2+ only | 0.843, 0.416–<br>1.708, 0.635 |                                           | 3.031, 0.919–<br>9.990, 0.068 | 2.895, 0.903–9.287,<br>0.074              | 0.750, 0.417–<br>1.348, 0.337 |                                           | 1.060, 0.623–<br>1.802, 0.830 | 1.060, 0.628–1.790,<br>0.827              |
| m-s AS+AR≥ 2+                | 0.773, 0.359–<br>1.661, 0.509 |                                           | 1.335, 0.360–<br>4.950, 0.666 | 1.340, 0.368–4.877,<br>0.657              | 0.953, 0.496–<br>1.832, 0.885 |                                           | 0.977, 0.535–<br>1.786, 0.941 | 0.961, 0.530–1.745,<br>0.897              |
| <b><i>BAV Aortopathy</i></b> |                               |                                           |                               |                                           |                               |                                           |                               |                                           |
| Root dilation only           | 0.626, 0.080–<br>4.887, 0.655 |                                           | 1.526, 0.338–<br>6.890, 0.583 | 1.453, 0.326–6.470,<br>0.624              | 1.509, 0.527–<br>4.326, 0.444 |                                           | 1.260, 0.477–<br>3.329, 0.641 |                                           |
| AAo dilation only            | 1.480, 0.799–<br>2.740, 0.213 |                                           | 1.708, 0.769–<br>3.793, 0.188 | 1.751, 0.808–3.794,<br>0.156              | 0.834, 0.513–<br>1.356, 0.464 |                                           | 0.990, 0.634–<br>1.545, 0.963 |                                           |
| Diffuse aortic dilation      | 0.867, 0.382–<br>1.968, 0.732 |                                           | 2.843, 1.179–<br>6.860, 0.020 | 2.899, 1.257–6.683,<br>0.013 <sup>#</sup> | 0.620, 0.332–<br>1.159, 0.134 |                                           | 0.978, 0.560–<br>1.707, 0.938 |                                           |
| Preoperative LVEF            | 1.003, 0.978–<br>1.028, 0.828 |                                           | 0.873, 0.844–<br>0.903, 0.000 | 0.873, 0.845–0.902,<br>0.000 <sup>#</sup> | 0.986, 0.966–<br>1.007, 0.199 |                                           | 0.999, 0.979–<br>1.018, 0.892 |                                           |
| Ascending aortic replacement | 0.944, 0.587–<br>1.518, 0.813 |                                           | 2.176, 1.159–<br>4.088, 0.016 | 2.154, 1.153–4.027,<br>0.016 <sup>#</sup> | 0.857, 0.572–<br>1.282, 0.452 |                                           | 0.552, 0.381–<br>0.800, 0.002 | 0.552, 0.395–0.772,<br>0.001 <sup>#</sup> |
| Aortic cross clamp time      | 1.012, 1.008–<br>1.016, 0.000 | 1.012, 1.008–1.015,<br>0.000 <sup>#</sup> | 1.012, 1.006–<br>1.019, 0.000 | 1.012, 1.006–1.019,<br>0.000 <sup>#</sup> | 1.015, 1.010–<br>1.021, 0.000 | 1.015, 1.011–1.020,<br>0.000 <sup>#</sup> | 1.005, 1.001–<br>1.010, 0.023 | 1.005, 1.001–1.010,<br>0.021 <sup>#</sup> |

Abbreviations: AS: aortic stenosis; AR: aortic regurgitation; AAo: ascending aorta; LVEF: left ventricular ejection fraction; EAE: early adverse event. <sup>#</sup>  $P < 0.05$ .

Table 7. Factors related to postoperative LVEF changes

| Variables               | Logistic regression: postoperative LVEF increase > 5% |                                        | Logistic regression: postoperative LVEF increase > 10% |                                        | Logistic regression: postoperative LVEF decrease > 5% |                                        | Logistic regression: postoperative LVEF decrease > 10% |                                        |
|-------------------------|-------------------------------------------------------|----------------------------------------|--------------------------------------------------------|----------------------------------------|-------------------------------------------------------|----------------------------------------|--------------------------------------------------------|----------------------------------------|
|                         | Univariable analysis (OR, CI, P)                      | Multivariable analysis (OR, CI, P)     | Univariable analysis (OR, CI, P)                       | Multivariable analysis (OR, CI, P)     | Univariable analysis (OR, CI, P)                      | Multivariable analysis (OR, CI, P)     | Univariable analysis (OR, CI, P)                       | Multivariable analysis (OR, CI, P)     |
|                         | Male                                                  | 0.757, 0.411–1.395, 0.372              | 0.696, 0.402–1.205, 0.195                              | 0.491, 0.189–1.280, 0.146              | 0.446, 0.188–1.060, 0.067                             | 0.865, 0.538–1.392, 0.551              | 0.884, 0.581–1.346, 0.565                              | 1.054, 0.587–1.891, 0.861              |
| Age                     | 0.998, 0.978–1.019, 0.870                             |                                        | 1.010, 0.974–1.047, 0.592                              |                                        | 0.994, 0.979–1.009, 0.447                             |                                        | 0.996, 0.979–1.014, 0.654                              |                                        |
| Body surface area       | 0.950, 0.227–3.970, 0.944                             |                                        | 1.280, 0.133–12.295, 0.831                             |                                        | 0.882, 0.288–2.706, 0.827                             |                                        | 0.455, 0.119–1.745, 0.251                              |                                        |
| Systolic blood pressure | 0.984, 0.970–0.997, 0.020                             | 0.984, 0.970–0.997, 0.017 <sup>#</sup> | 0.981, 0.959–1.003, 0.093                              | 0.981, 0.959–1.003, 0.084              | 1.005, 0.994–1.016, 0.355                             |                                        | 1.009, 0.996–1.022, 0.194                              |                                        |
| Preoperative LVEF       | 0.877, 0.851–0.904, 0.000                             | 0.880, 0.854–0.906, 0.000 <sup>#</sup> | 0.849, 0.811–0.888, 0.000                              | 0.855, 0.819–0.892, 0.000 <sup>#</sup> | 1.121, 1.091–1.152, 0.000                             | 1.120, 1.091–1.150, 0.000 <sup>#</sup> | 1.110, 1.076–1.145, 0.000                              | 1.110, 1.075–1.145, 0.000 <sup>#</sup> |

*Valvulopathy*

|                                           |                           |                                        |                           |                           |                           |                                        |                           |                                        |
|-------------------------------------------|---------------------------|----------------------------------------|---------------------------|---------------------------|---------------------------|----------------------------------------|---------------------------|----------------------------------------|
| Moderate to severe stenosis (m-s AS) only | 2.552, 1.143–5.698, 0.022 | 2.559, 1.173–5.583, 0.018 <sup>#</sup> | 1.533, 0.429–5.476, 0.511 | 1.621, 0.484–5.429, 0.434 | 0.051, 0.302–1.003, 0.051 | 0.576, 0.327–1.013, 0.056              | 0.402, 0.183–0.882, 0.023 | 0.437, 0.206–0.925, 0.030 <sup>#</sup> |
| Regurgitation (AR) ≥ 2+ only              | 0.665, 0.290–1.523, 0.334 | 0.670, 0.295–1.520, 0.338              | 0.299, 0.068–1.319, 0.111 | 0.277, 0.069–1.105, 0.069 | 2.229, 1.262–3.937, 0.006 | 2.486, 1.439–4.298, 0.001 <sup>#</sup> | 2.913, 1.463–5.799, 0.002 | 3.172, 1.635–6.155, 0.001 <sup>#</sup> |
| m-s AS+AR ≥ 2+                            | 1.048, 0.422–2.607, 0.919 | 0.996, 0.406–2.444, 0.992              | 0.699, 0.160–3.050, 0.634 | 0.655, 0.156–2.747, 0.563 | 1.294, 0.680–2.462, 0.432 | 1.389, 0.741–2.606, 0.305              | 1.768, 0.824–3.792, 0.144 | 1.915, 0.909–4.037, 0.088              |
| <b><i>BAV Aortopathy</i></b>              |                           |                                        |                           |                           |                           |                                        |                           |                                        |
| Root dilation only                        | 0.715, 0.171–2.988, 0.646 |                                        | *                         |                           | 1.080, 0.383–3.045, 0.885 |                                        | 0.824, 0.236–2.877, 0.761 |                                        |
| AAo dilation only                         | 0.634, 0.336–1.198, 0.161 |                                        | 0.987, 0.363–2.684, 0.980 |                           | 1.362, 0.842–2.206, 0.208 |                                        | 1.010, 0.574–1.780, 0.971 |                                        |
| Diffuse aortic dilation                   | 0.469, 0.202–1.087, 0.078 |                                        | 0.419, 0.094–1.867, 0.254 |                           | 1.665, 0.914–3.033, 0.096 |                                        | 1.058, 0.534–2.098, 0.871 |                                        |
| Ascending aortic replacement              | 0.472, 0.273–0.817, 0.007 | 0.604, 0.376–0.971, 0.037 <sup>#</sup> | 0.609, 0.255–1.455, 0.264 |                           | 1.418, 0.949–2.117, 0.088 |                                        | 1.158, 0.720–1.863, 0.546 |                                        |
| Aortic cross clamp time                   | 0.998, 0.992–1.004, 0.583 |                                        | 0.995, 0.986–1.004, 0.286 |                           | 1.005, 1.000–1.010, 0.060 | 1.004, 1.000–1.009, 0.078              | 1.007, 1.002–1.013, 0.009 | 1.007, 1.001–1.012, 0.017 <sup>#</sup> |

Abbreviations: AS: aortic stenosis; AR: aortic regurgitation; AAo: ascending aorta; LVEF: left ventricular ejection fraction. \* There are too few patients to do the analysis. <sup>#</sup>*P* < 0.05.

1 **Supplementary tables:**

2

3

Table 1. Risk factors for BAV Valvulopathy (use hypertension instead of systolic blood pressure)

| Variable                  | Moderate to severe stenosis (m-s AS) only<br>(OR, CI, P) | Regurgitation (AR) $\geq$ 2+ only (OR,<br>CI, P) | m-s AS+AR $\geq$ 2+ (OR,<br>CI, P)        |
|---------------------------|----------------------------------------------------------|--------------------------------------------------|-------------------------------------------|
| Age                       | 1.039, 1.022–1.055, 0.000 <sup>#</sup>                   | 0.983, 0.969–0.998, 0.026                        | 1.010, 0.991–1.028,<br>0.316              |
| Body surface area         | 0.143, 0.042–0.484, 0.002 <sup>#</sup>                   | 0.494, 0.161–1.518, 0.218                        | 0.043, 0.010–0.183,<br>0.000 <sup>#</sup> |
| Hypertension              | 0.995, 0.671–1.478, 0.982                                | 0.975, 0.661–1.438, 0.899                        | 1.205, 0.747–1.946,<br>0.444              |
| No Tobacco                | 1.152, 0.729–1.820, 0.544                                | 1.755, 1.170–2.631, 0.007 <sup>#</sup>           | 1.021, 0.612–1.704,<br>0.937              |
| Triglyceride              | 0.931, 0.786–1.103, 0.441                                | 0.935, 0.797–1.097, 0.409                        | 0.968, 0.794–1.180,<br>0.748              |
| Total cholesterol         | 1.061, 0.883–1.274, 0.530                                | 0.918, 0.765–1.100, 0.354                        | 1.159, 0.933–1.440,<br>0.183              |
| <i>Sievers types</i>      |                                                          |                                                  |                                           |
| Sievers types 0           | 1.095, 0.362–3.312, 0.872                                | 0.901, 0.278–2.921, 0.862                        | 0.671, 0.186–2.414,<br>0.541              |
| Sievers type 1 L - R      | 2.373, 0.801–7.030, 0.119                                | 3.514, 1.126–10.967, 0.030                       | 1.817, 0.530–6.232,<br>0.342              |
| Sievers type 1 R–N        | 1.424, 0.438–4.626, 0.557                                | 3.099, 0.922–10.420, 0.067                       | 2.102, 0.565–7.821,<br>0.268              |
| <i>Aortopathy</i>         |                                                          |                                                  |                                           |
| Root dilation only (n, %) | 0.847, 0.213–3.366, 0.814                                | 1.865, 0.651–5.340, 0.246                        | *                                         |

|                                |                                        |                                        |                           |              |
|--------------------------------|----------------------------------------|----------------------------------------|---------------------------|--------------|
| AAo dilation only (n, %)       | 1.287, 0.832–2.785, 0.257              | 0.754, 0.481–1.180, 0.216              | 1.939, 0.027              | 1.078–3.489, |
| Diffuse aortic dilation (n, %) | 0.253, 0.121–0.527, 0.000 <sup>#</sup> | 1.4247, 0.736–2.110, 0.412             | 2.214, 0.027 <sup>#</sup> | 1.097–4.468, |
| Male                           | 1.139, 0.678–1.914, 0.622              | 4.669, 0.264–8.239, 0.000 <sup>#</sup> | 2.794, 0.002 <sup>#</sup> | 1.454–5.371, |

- 1 Abbreviations: Type 0: BAV with no raphe; Type 1 L-R: type 1 BAV with fusion between the left and right coronary cusp; Type 1 R-N: type 1
- 2 BAV with fusion between the right and noncoronary cusp; BAV: bicuspid aortic valve; AS: aortic stenosis; AR: aortic regurgitation. AAo:
- 3 ascending aorta. \* There are too few patients to do the analysis. <sup>#</sup>*P* < 0.05.
- 4



1 Table 2. Risk factors for BAV Valvulopathy in male (use hypertension instead of systolic blood pressure)

| Variable                    | Moderate to severe stenosis (m-s AS) only<br>(OR, CI, P) | Regurgitation (AR) $\geq$ 2+ only (OR,<br>CI, P) | m-s AS+AR $\geq$ 2+ (OR,<br>CI, P)        |
|-----------------------------|----------------------------------------------------------|--------------------------------------------------|-------------------------------------------|
| Age                         | 1.048, 1.026–1.070, 0.000 <sup>#</sup>                   | 0.985, 0.969–1.002, 0.085                        | 1.002, 0.981–1.024,<br>0.829              |
| Body surface area           | 0.086, 0.019–0.389, 0.001 <sup>#</sup>                   | 0.495, 0.146–1.677, 0.259                        | 0.047, 0.009–0.232,<br>0.000 <sup>#</sup> |
| Hypertension                | 0.944, 0.582–1.533, 0.817                                | 0.872, 0.571–1.331, 0.526                        | 1.336, 0.772–2.314,<br>0.301              |
| No Tobacco                  | 1.295, 0.800–2.096, 0.293                                | 1.936, 1.282–2.922, 0.002 <sup>#</sup>           | 1.118, 0.659–1.897,<br>0.678              |
| Triglyceride                | 0.963, 0.780–1.189, 0.727                                | 0.945, 0.797–1.121, 0.561                        | 0.955, 0.758–1.203,<br>0.695              |
| Total cholesterol           | 1.081, 0.852–1.370, 0.522                                | 0.971, 0.790–1.193, 0.780                        | 1.196, 0.926–1.543,<br>0.170              |
| <b><i>Sievers types</i></b> |                                                          |                                                  |                                           |
| Sievers types 0             | 1.302, 0.336–5.044, 0.702                                | 1.081, 0.288–4.058, 0.908                        | 0.484, 0.121–1.942,<br>0.306              |
| Sievers type 1 L - R        | 2.296, 0.609–8.651, 0.220                                | 3.646, 1.010–13.161, 0.048                       | 1.310, 0.350–4.907,<br>0.689              |
| Sievers type 1 R–N          | 0.928, 0.211–4.075, 0.921                                | 2.962, 0.756–11.604, 0.119                       | 1.442, 0.347–5.992,<br>0.614              |
| <b><i>Aortopathy</i></b>    |                                                          |                                                  |                                           |
| Root dilation only (n, %)   | 0.819, 0.176–3.812, 0.799                                | 1.770, 0.606–5.166, 0.296                        | *                                         |
| AAo dilation only (n, %)    | 1.596, 0.898–2.836, 0.111                                | 0.828, 0.497–1.380, 0.470                        | 1.998, 0.990–4.033,<br>0.053              |

|                         |                           |                           |                     |
|-------------------------|---------------------------|---------------------------|---------------------|
| Diffuse aortic dilation | 0.351, 0.157–0.784, 0.011 | 1.345, 0.763–2.371, 0.305 | 2.568, 1.179–5.593, |
| (n, %)                  |                           |                           | 0.018 <sup>#</sup>  |

1 Abbreviations: Type 0: BAV with no raphe; Type 1 L-R: type 1 BAV with fusion between the left and right coronary cusp; Type 1 R-N: type 1  
2 BAV with fusion between the right and noncoronary cusp; BAV: bicuspid aortic valve; AS: aortic stenosis; AR: aortic regurgitation. AAo:  
3 ascending aorta. \* There are too few patients to do the analysis. <sup>#</sup>*P* < 0.05.

4

5

1 Figure

2 Figure 1. Study Design.

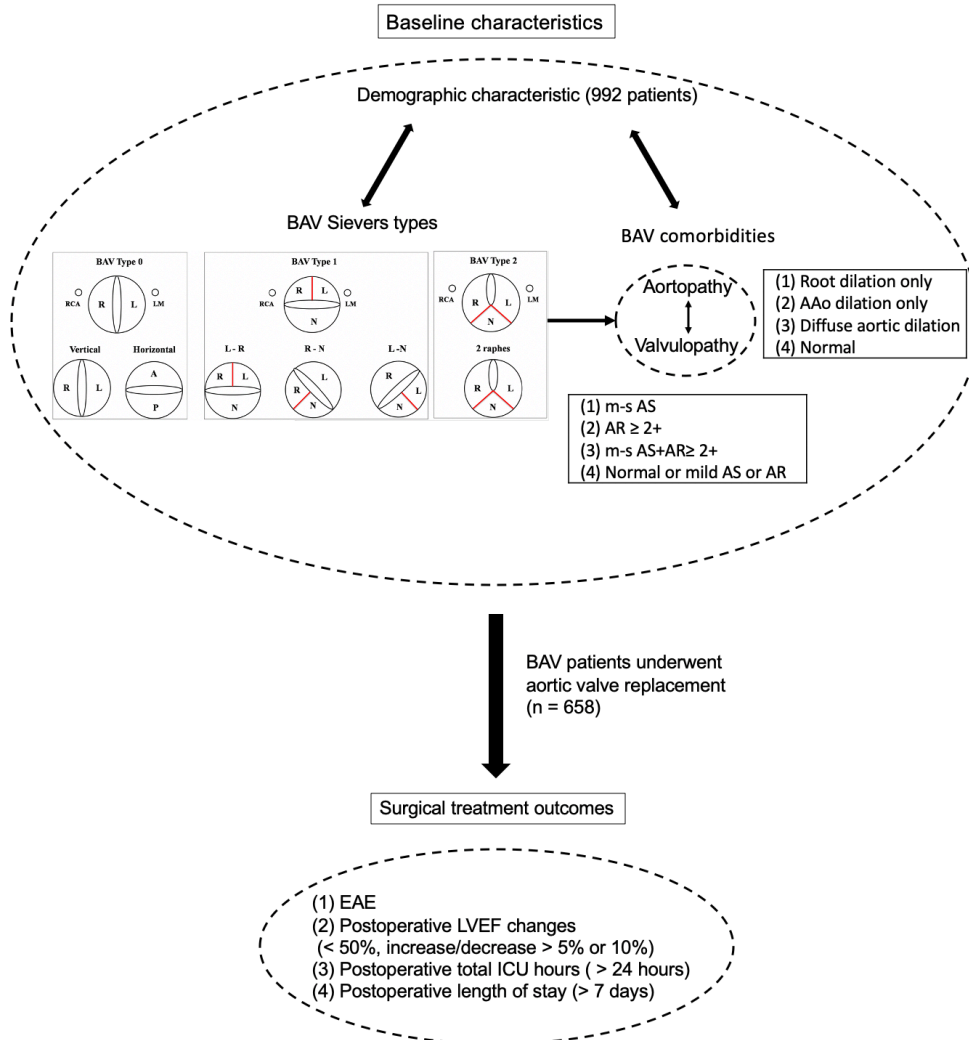

3

4 Abbreviations: BAV: bicuspid aortic valve; Type 0: BAV with no raphe; Type 1 L-R: type 1 BAV with fusion

5 between the left and right coronary cusp; Type 1 R-N: type 1 BAV with fusion between the right and noncoronary

6 cusp; Type 1 L-N: type 1 BAV with fusion between the left and noncoronary cusp; m-s AS: moderate to severe

7 aortic stenosis; AR  $\geq$  2+: aortic regurgitation  $\geq$  2+; AAo: ascending aorta; LVEF: left ventricular ejection fraction;

8 EAE: early adverse event; ICU: intensive care unit.

9
